# Supplementary material for: Randomised controlled trial to assess the impact of a lifestyle intervention (ActWELL) in women invited to NHS breast screening
Source: PubMed Central journal article supplement — BMJ Open. 2018 Nov 8;8(11):e024136. doi: 10.1136/bmjopen-2018-024136 (PMC6231585; doi:10.1136/bmjopen-2018-024136), 2018-11-08
Supplement: bmjopen-2018-024136.draft_revisions.pdf [file bmjopen-2018-024136.draft_revisions.pdf]

# BMJ Open

BMJ Open is committed to open peer review. As part of this commitment we make the peer review history of every article we publish publicly available.

When an article is published we post the peer reviewers' comments and the authors' responses online. We also post the versions of the paper that were used during peer review. These are the versions that the peer review comments apply to.

The versions of the paper that follow are the versions that were submitted during the peer review process. They are not the versions of record or the final published versions. They should not be cited or distributed as the published version of this manuscript.

BMJ Open is an open access journal and the full, final, typeset and author-corrected version of record of the manuscript is available on our site with no access controls, subscription charges or pay-per-view fees (<http://bmjopen.bmj.com>).

If you have any questions on BMJ Open's open peer review process please email [info.bmjopen@bmj.com](mailto:info.bmjopen@bmj.com)

# BMJ Open

## A randomised controlled trial to assess the impact of a lifestyle intervention (ActWELL) in women invited to NHS breast screening – study protocol

|                               |                                                                                                                                                                                                                                                                                                                                                                                                                                                                                                                                                                                                                                                                                                                                                                                                                                                                                                                                                                                                                                                                                                                                                      |
|-------------------------------|------------------------------------------------------------------------------------------------------------------------------------------------------------------------------------------------------------------------------------------------------------------------------------------------------------------------------------------------------------------------------------------------------------------------------------------------------------------------------------------------------------------------------------------------------------------------------------------------------------------------------------------------------------------------------------------------------------------------------------------------------------------------------------------------------------------------------------------------------------------------------------------------------------------------------------------------------------------------------------------------------------------------------------------------------------------------------------------------------------------------------------------------------|
| Journal:                      | <i>BMJ Open</i>                                                                                                                                                                                                                                                                                                                                                                                                                                                                                                                                                                                                                                                                                                                                                                                                                                                                                                                                                                                                                                                                                                                                      |
| Manuscript ID                 | bmjopen-2018-024136                                                                                                                                                                                                                                                                                                                                                                                                                                                                                                                                                                                                                                                                                                                                                                                                                                                                                                                                                                                                                                                                                                                                  |
| Article Type:                 | Protocol                                                                                                                                                                                                                                                                                                                                                                                                                                                                                                                                                                                                                                                                                                                                                                                                                                                                                                                                                                                                                                                                                                                                             |
| Date Submitted by the Author: | 10-May-2018                                                                                                                                                                                                                                                                                                                                                                                                                                                                                                                                                                                                                                                                                                                                                                                                                                                                                                                                                                                                                                                                                                                                          |
| Complete List of Authors:     | Anderson, Annie; University of Dundee, Centre for Research into Cancer Prevention and screening<br>Craigie, Angela; Centre for Research into Cancer Prevention and Screening, Medical Research Institute, University of Dundee<br>Gallant, Stephanie; University of Dundee, School of Medicine<br>McAdam, Chloe; University of Edinburgh, Institute for Sport, Physical Education & Health Sciences<br>Macaskill, E. ; NHS Tayside, Department of Breast Surgery<br>Mutrie, Nanette; University of Edinburgh, Chair of Physical Activity for Health University of Edinburgh College of Humanities and Social Science<br>Institute for Sport, Physical Education and Health Sciences St Leonard's Land Holyrood Road Edinburgh EH8 8AQ<br>Nelson, Aileen; University of Aberdeen, Health Economics Research Unit<br>O'carroll, Ronan; University of Stirling,<br>Rauchhaus, Petra; University of Dundee, Dundee Epidemiology and Biostatistics Unit<br>Sattar, Naveed; University of Glasgow, BHF centre<br>Stead, Martine; University of Stirling and the Open University, Institute for Social Marketing<br>Treweek, Shaun; University of Aberdeen, |
| Keywords:                     | Cancer prevention, Breast cancer, Screening, Lifestyle, Behaviour modification                                                                                                                                                                                                                                                                                                                                                                                                                                                                                                                                                                                                                                                                                                                                                                                                                                                                                                                                                                                                                                                                       |
|                               |                                                                                                                                                                                                                                                                                                                                                                                                                                                                                                                                                                                                                                                                                                                                                                                                                                                                                                                                                                                                                                                                                                                                                      |

SCHOLARONE™  
Manuscripts

# A randomised controlled trial to assess the impact of a lifestyle intervention (ActWELL) in women invited to NHS breast screening – study protocol

## Authors

Annie S. Anderson<sup>1</sup>, Angela Craigie<sup>1</sup>, Stephanie Gallant<sup>1</sup>, Chloe McAdam<sup>2</sup>, E. Jane Macaskill<sup>3</sup>, Nanette Mutrie<sup>2</sup>, Aileen R Neilson<sup>4</sup>, Ronan E O'Carroll<sup>5</sup>, Petra Rauchhaus<sup>6</sup>, Naveed Sattar<sup>7</sup>, Martine Stead<sup>8</sup>, Shaun Treweek<sup>9</sup>

## Addresses

1. Centre for Research into Cancer Prevention and Screening / Tayside Cancer Centre, Division of Cancer Research, University of Dundee, Level 7, Ninewells Hospital & Medical School, Dundee DD1 9SY, UK [a.s.anderson@dundee.ac.uk](mailto:a.s.anderson@dundee.ac.uk); [a.craigie@dundee.ac.uk](mailto:a.craigie@dundee.ac.uk); [s.gallant@dundee.ac.uk](mailto:s.gallant@dundee.ac.uk)
2. University of Edinburgh, Physical Activity for Health Research Centre, Institute for Sport, Physical Education and Health Sciences, St Leonard's Land, Holyrood Road, Edinburgh, EH8 8AQ, UK [Chloe.Mcadam@ed.ac.uk](mailto:Chloe.Mcadam@ed.ac.uk); [Nanette.mutrie@ed.ac.uk](mailto:Nanette.mutrie@ed.ac.uk)
3. Department of Breast Surgery, NHS Tayside, Ninewells Hospital & Medical School, Dundee, UK, DD1 9SY [ejanemacaskill@nhs.net](mailto:ejanemacaskill@nhs.net)
4. Health Economics Research Unit, Polwarth Building, University of Aberdeen, Foresterhill, AB25 2ZD, UK [aileen.neilson@abdn.ac.uk](mailto:aileen.neilson@abdn.ac.uk)
5. Division of Psychology, School of Natural Sciences, University of Stirling, Stirling, FK9 4LA, UK [ronan.ocarroll@stir.ac.uk](mailto:ronan.ocarroll@stir.ac.uk)
6. Petra Rauchhaus, Tayside Clinical Trials Unit, Tayside Medical Sciences Centre, Ninewells Hospital and Medical School, Dundee DD1 9SY [P.Rauchhaus@dundee.ac.uk](mailto:P.Rauchhaus@dundee.ac.uk)
7. Institute of Cardiovascular and Medical Sciences, University of Glasgow, Glasgow, G12 8TA, UK [naveed.sattar@glasgow.ac.uk](mailto:naveed.sattar@glasgow.ac.uk)
8. Institute for Social Marketing, University of Stirling, Stirling FK9 4LA, Scotland, UK [martine.stead@stir.ac.uk](mailto:martine.stead@stir.ac.uk)
9. Health Services Research Unit, University of Aberdeen, Health Sciences Building, Foresterhill, Aberdeen, AB25 2ZD, UK [stweek@mac.com](mailto:stweek@mac.com)

## Correspondence to:

1 Professor Annie S. Anderson

2 Centre for Research into Cancer Prevention and Screening

3 Level 7, Mailbox 7,

4 Ninewells Medical School

5 Dundee DD1 9SY

6 Tel: 0044 (0)1382 383299

7 Fax: 0044 (0)1382 632333

8 E mail: [a.s.anderson@dundee.ac.uk](mailto:a.s.anderson@dundee.ac.uk)

9 Word count: Abstract 267 Paper 5650

10  
11  
12  
13  
14  
15  
16  
17  
18  
19  
20  
21  
22  
23  
24  
25  
26  
27  
28  
29  
30  
31  
32  
33  
34  
35  
36  
37  
38  
39  
40  
41  
42  
43  
44  
45  
46  
47  
48  
49  
50  
51  
52  
53  
54  
55  
56  
57  
58  
59  
60

For peer review only

## ABSTRACT

**Introduction** In Scotland, the incidence of breast cancer is predicted to rise by 27% by 2030 and whilst there are measures to support reductions in morbidity and mortality, the breast cancer community is currently exploring preventative opportunities including supporting weight management programmes in post-menopausal women. This study aims to assess the effectiveness and cost-effectiveness of a theory-based, community delivered, minimal contact, weight management (diet, physical activity and behaviour change techniques) programme (ActWELL) in women with a BMI >25 kg/m<sup>2</sup> attending routine breast cancer screening appointments.

**Methods and analysis** The study will be a 4 centre, 1:1 parallel group RCT of a 12 month weight management intervention initiated in breast cancer screening centres, delivered by trained Breast Cancer Now lifestyle coaches in community settings. The intervention programme involves 2 intervention meetings with coaches plus (up to) nine telephone contacts over 12 months. The programme will focus on personalised diet (including alcoholic and sugary drinks) and physical activity habits. Behaviour change techniques include self-monitoring, goal setting, implementation intentions, action and coping plans. The study has a sample size of 414 women with a BMI >25 kg/m<sup>2</sup> attending routine national **NHS** breast cancer screening appointments. Measures will be taken at baseline, 12 weeks and at 12 month follow up, complemented by qualitative interviews exploring perceived acceptability and impact on habitual behaviours. The two co-primary outcomes are mean change in measured body weight and change in physical activity between groups to 12 months. Secondary outcomes are changes in eating habits, alcohol intake, sedentary time, quality of life, waist circumference, lipid, HbA1c and insulin profiles, blood pressure, and cost-effectiveness of the intervention.

**Ethics and dissemination** The protocol has been approved by East of Scotland Research Ethics Committee (17/ES/0073). All participants provide written informed consent. Dissemination will be through peer-reviewed publication and conference presentations.

**Trial registration number** ISRCTN11057518

**Keywords** Cancer prevention, breast cancer, screening, lifestyle, behaviour modification

## Article Summary

### Strengths and limitations of this study

- This work has the potential to provide routine support for weight management for women aged over 50 years
- This study has been developed from a well conducted feasibility trial with positive indicative outcomes
- Multi-centre, randomised control design
- Strong study team combining staff from academia, NHS, breast cancer charity and healthy screening attendees
- Novel approach to deliver weight management by trained in community locations
- The study has a large potential reach with around 73% of ALL women of this age group attending appointments including high numbers from disadvantaged backgrounds
- The intervention will not be readily accessible for women who do not accept screening appointments
- Not all women interested in lifestyle change will be able to participate due to capacity issues with lifestyle coaches

### Competing interest statement

All authors have completed the ICMJE uniform disclosure form at [www.icmje.org/coi\\_disclosure.pdf](http://www.icmje.org/coi_disclosure.pdf) and declare: no support from any organisation for the submitted work other than the Scottish Government who funded the award, no financial relationships with any organisations that might have an interest in the submitted work in the previous three years, and no other relationships or activities that could appear to have influenced the submitted work.

### Ethics approval

Ethical approval for this study was provided by East of Scotland Research Ethics Service (REC reference: (17/ES/0073).

### Funding

This work was supported by The Scottish Government, grant number BC/Screening/17/01.

## Author Contributions

ASA is the principal investigator and has overall responsibility for all aspects of the ActWELL study. She initiated the study, designed the intervention, led on development of the protocol and drafting the manuscript. AC, CMcA and NM were involved in intervention design and training, assessment methodology and finalising the protocol. SG is the trial manager and responsible for co-ordinating all aspects of the ActWELL study and drafting the protocol. EJM has responsibility for clinical issues, inclusion and exclusion criteria, trial design and finalising the protocol. AN is responsible for health economics analysis, assessment methodology and finalising protocol. RO has responsibility for all psychological aspects of intervention design, assessment methodology, fidelity measures and finalising the protocol. NS is responsible for design of blood collection procedures, overseeing analysis or bloods and finalising protocol design. MS is responsible for formative qualitative analysis, intervention design, acceptability measures and finalising protocol. ST is responsible for trial design, recruitment strategies, day to day management decisions (with ASA and SG), and finalising protocol. All authors contributed to writing this paper and approved the final draft.

**Provenance and Peer Review** Externally peer reviewed.

## Acknowledgements

The authors would like to acknowledge the assistance of Mary Allison, Amy Hickman, and Eluned Hughes from Breast Cancer Now and Dr Stephen Caswell in manuscript preparation and co-ordination of volunteer training.

Staff at the NHS Scottish Breast Screening Programme who have assisted in programme design.

The Health Services Research Unit and The Health Economics Research Unit, University of Aberdeen receives core funding from the Chief Scientist Office of the Scottish Government Health Directorates.

## Data Sharing Statement

None

## INTRODUCTION

Breast cancer accounted for 14.5% of all cancer diagnoses in Scotland in 2014 and accounts for 28% of female cancer cases<sup>1</sup>. Incidence is increasing and current predictions from ISD (Scottish Government) suggest a rise by 27.5% between and 2008-2012 and 2023-2027<sup>2</sup>.

Whilst many factors are implicated in aetiology (genetics, reproductive history, hormone use), current estimates suggest that 38% of breast cancers in post-menopausal women in the UK are related to physical inactivity, alcohol consumption and body fatness<sup>3</sup>. There is consistent evidence that being overweight or obese throughout adulthood increases the risk of post-menopausal breast cancer<sup>4</sup>.

In addition, gaining weight in adult life is a strong predictor of breast cancer (especially in women who have not taken hormone replacement therapy)<sup>5</sup>. Ahn et al reported that at any BMI, increased weight in adult life is associated with greater risk of breast cancer and a gain of 2-10kg after the age of 50 (e.g. post-menopausal) is associated with a 30% increase in breast cancer risk<sup>6</sup>. Findings from the EPIC study have also demonstrated that high weight gain in middle adulthood increases the risk of breast cancer<sup>7</sup>. In the Women's Health Initiative, Neuhouser et al.<sup>8</sup> reported that post-menopausal women with a BMI < 25kg/m<sup>2</sup> at baseline who gained >5kg of body weight during the follow up period (median 13 years) had a 36% increase risk of developing breast cancer.

Lifestyles and weight management are also related to risk reduction. Women meeting at least 5 of the World Cancer Research Fund prevention guidelines for lifestyle show a 60% lower risk for breast cancer compared to women meeting none of the guidelines<sup>9</sup> and a recent systematic review reported that high versus low adherence to cancer prevention guidelines was associated with consistent reductions in breast cancer incidence<sup>10</sup>. Data from audits of bariatric surgery show that large weight losses are associated with large decreases in female cancers<sup>11</sup>. One recent North American study of 22,198 people 3.5 years after bariatric surgery reported reductions in post-menopausal breast cancer of 42%<sup>12</sup>. In addition, moderating weight gain in adult life through caloric adjustment and being physically active is likely to be of benefit for reduction in other cancers related to these behaviours<sup>13</sup> as well as other non-communicable diseases<sup>14,15</sup>.

Most (73%) Scottish women aged 50 to 70 years accept invitations to attend the routine NHS Scottish Breast Screening Programme (NHSSBSP) and over 175,000 women attend each year<sup>16</sup>. In addition, women aged over 70 are able to attend through self-referral. The



1 NHSSBSP therefore provides a unique opportunity to endorse weight management  
2 intervention. However, a greater understanding of the benefits, costs, acceptability and  
3 impacts are needed to examine whether a NHSSBSP-initiated intervention can be effective  
4 and cost efficient.  
5  
6

7 In 2007, Fisher et al.<sup>17</sup> reported that most women attending breast screening clinics are  
8 interested in receiving lifestyle advice, and an updated paper reporting the view of 1,803  
9 women shows overwhelming support for receiving interventions through this setting<sup>18</sup>.  
10 However, a review published in 2013<sup>19</sup> reported that whilst the importance of weight  
11 management in breast and colorectal cancer prevention is widely recognised, there is little  
12 evidence that lifestyle is discussed within cancer screening settings. It was also noted that  
13 the lack of advocacy about health behaviour change may endorse poor health behaviours by  
14 creating a 'health certificate effect.' This issue may be particularly relevant for body weight,  
15 where a lack of guidance to visibly obese patients may imply a lack of medical concern. The  
16 cancer research "gap analysis" reviews by Breast Cancer Campaign<sup>20,21</sup> highlighted the role  
17 of breast screening programmes as an opportunity for promoting cancer prevention  
18 activities, but noted the challenge of finding ways to support and facilitate women to  
19 achieve healthy ways of life.  
20  
21  
22  
23  
24  
25  
26

27 In Scotland, the breast cancer community (government, charities and health professionals)  
28 is currently exploring innovative and sustainable preventative opportunities including  
29 supporting weight management programmes. The Scottish Health Survey<sup>22</sup> has reported  
30 that 72% of women aged 55 to 74 years have a BMI >25kg/m<sup>2</sup> (76% in women living in  
31 areas of higher deprivation). Furthermore, 42% of women **do not** achieve the  
32 recommendation of 150 minutes of physical activity per week, and this proportion increases  
33 with age. The National Institute of Clinical Excellence (NICE)<sup>23</sup> recommend that lifestyle  
34 weight management programmes are multi component and aim to reduce a person's energy  
35 intake and help them to be more physically active by changing behaviour. However, access  
36 to such NHS programmes is limited and commercial programmes have cost implications for  
37 low income adults.  
38  
39  
40  
41  
42  
43  
44

45 It is recognised that partnerships between the NHS and the voluntary sector offer significant  
46 value for money and the potential for greater "reach" of interventions into community  
47 settings. The recent Lancet series on obesity highlighted that, despite government efforts to  
48 reduce the prevalence of obesity, these approaches are insufficient to help adults who are  
49 currently overweight or obese<sup>24</sup>. Innovative strategies beyond those currently delivered by  
50 health professionals are needed to increase capacity of delivery of weight management  
51 programmes.  
52  
53  
54  
55

1 Community lifestyle interventions initiated in the breast cancer screening setting are a  
2 largely unexplored area although repeated triennial appointments offer unique opportunities  
3 for initiation and re-enforcement<sup>25</sup>. This setting also provides an opportunity to engage with  
4 women from areas of higher deprivation (63%, 71% and 76% of women from Scottish  
5 Index of Multiple Deprivation (SIMD 1, 2, 3 quintiles respectively attend for screening)<sup>26</sup>.  
6  
7

8  
9 The ActWELL feasibility study demonstrated that recruitment, retention, indicative results  
10 and participant acceptability merited a full randomised control trial to test the long term  
11 impact of the intervention. In addition, 31% of participants recruited were from the lowest  
12 two quintiles of deprivation<sup>27</sup> indicating significant potential to reach women from higher  
13 rates of social deprivation who also tend to be more obese.  
14  
15

16  
17 Feedback from screening centre users showed whilst many were aware of lifestyle issues in  
18 relation to diabetes and cardiovascular disease, information about lifestyle and breast  
19 cancer was new and considered “motivating” if the focus was on positive ways to help  
20 support behaviour change<sup>28</sup>.  
21  
22

23  
24 The current study is designed to assess the effectiveness of a community based,  
25 personalised, minimal contact weight management programme in women with a  
26 BMI>25kg/m<sup>2</sup> attending routine breast cancer screening clinics. The intervention  
27 programme is a collaboration between the charity Breast Cancer Now (BCN), NHSSBSP,  
28 local authority leisure centres and academic partners. This work is the first time that a  
29 cancer charity has offered volunteer capacity for cancer prevention action on weight  
30 management and offers significant potential to address gaps in public health efforts. The  
31 design is pragmatic to increase the relevance of the findings to policymakers, women  
32 eligible for breast screening and health professionals (see Appendix 1).  
33  
34  
35  
36  
37

38 The study aims to assess the effectiveness and cost-effectiveness of a theory based,  
39 community delivered, minimal contact, weight management (diet, physical activity and  
40 behaviour change techniques) programme (ActWELL) in women with a BMI >25 kg/m<sup>2</sup>  
41 attending routine breast cancer screening clinics.  
42  
43  
44

## 45 **METHODS AND ANALYSIS**

### 46 **Trial design and setting**

47  
48  
49 The study will be a four centre, 1:1 parallel-arm, randomised controlled trial of a 12 month,  
50 weight management intervention. The participants will be randomly allocated into two  
51 groups (1) standard care with health information leaflet or (2) experimental group who  
52 receive the ActWELL intervention. Potential participants will be introduced to the study whilst  
53  
54  
55

1 attending routine NHS breast cancer screening appointment (static and mobile screening  
2 units) in Scotland. The study participant flow is presented in Figure 1.  
3

4 All trial measurements will be undertaken by trained research nurses at baseline, 12 weeks  
5 and 12 months within the NHS Clinical Research Centres (CRC) in the areas served by the  
6 breast screening sites.  
7  
8

9 The intervention is delivered and supported by Breast Cancer Now volunteers who have  
10 undergone two days bespoke training on the intervention. The face to face intervention  
11 communications are delivered within local authority run leisure centres (or other appropriate  
12 community locations).  
13  
14  
15

### 16 **Participants**

17  
18 All attendees at routine NHS breast screening appointments will be advised about the study  
19 by NHSSBSP staff in writing and verbally. On checking in at the clinic women will be given a  
20 brief study information leaflet by the receptionist. During their visit the mammographer will  
21 briefly (approx. 30 seconds) mention the study verbally. If they are agreeable to a  
22 researcher making contact with them, women will be invited to leave their details on a  
23 contact card (telephone/email/postcode) which they can place in a study box in the  
24 reception area. A pop up banner, or poster, will also be displayed in the breast screening  
25 clinic or mobile van to further highlight the study and how to contact the research team. All  
26 NHS screening staff will be provided with training which introduces the aims of the study,  
27 why the trial is designed the way it is, the importance of their role, how to minimise the  
28 time taken to introduce the study and how to answer common questions. Within each site, a  
29 team "champion" will be identified from within the NHSSBSP staff to encourage colleagues  
30 and co-ordinate recruitment efforts.  
31  
32  
33  
34  
35  
36  
37  
38

39 Research staff will contact women leaving contact cards within two weeks and assess study  
40 eligibility.  
41  
42

### 43 **Inclusion Criteria**

- 44 • Attending, or invited to attend, routine breast screening clinics (not recall clinics)
- 45 • Measured BMI >25 kg/m<sup>2</sup>
- 46 • Age 50 to 70 years
- 47
- 48
- 49

### 50 **Exclusion Criteria**

- 51 • Currently undergoing treatment for any malignant condition (excluding basal or  
52 squamous cell skin cancers)  
53  
54  
55

- 1 • Reported contra-indication to physical activity (e.g. recent surgery)
- 2
- 3 • Reported contra-indication to weight loss (e.g. currently following a recovery
- 4 programme for weight gain)
- 5
- 6 • On a specialised diet e.g. gluten free
- 7
- 8 • Diagnosis of Types 1 diabetes
- 9
- 10 • Current use of insulin
- 11
- 12 • No telephone contact
- 13
- 14 • Unable to consent
- 15

16  
17  
18 Participants who are considered eligible will be invited to attend their local research centre  
19 to provide informed consent before commencing baseline measures.

20  
21  
22 Participants found to be ineligible to take part, either on telephone screening or at a  
23 baseline visit, will be thanked for their time and will be offered, by post or email, lifestyle  
24 and cancer prevention information and/or information on local leisure facilities applicable to  
25 them. Where possible, this will also apply to women who have expressed an interest (e.g.  
26 left a completed card) but who have not been selected to take part in the trial due to the  
27 volume of people that can be seen by the research team. In the event of very large  
28 numbers of cards being returned it may not be possible to contact all women and this is  
29 made clear in the brief information leaflet.

### 30 31 32 33 34 35 **Randomisation**

36  
37 Participants will be randomised centrally at a 1:1 ratio into the intervention or usual care  
38 groups using the web-based TRuST system designed by Tayside Clinical Trials Unit (TCTU).  
39 Randomisation will be stratified by site and minimised by socio-economic status based on  
40 Social index of Multiple Deprivation (SIMD)<sup>29</sup> SIMD (two groups: SIMD 1 or 2; SIMD $\geq$ 3).

41  
42  
43 In addition, a sub group comprising 146 women (73 from each group) will be randomly  
44 allocated by the TRuST system to receive an activPAL™ monitor (accelerometer) as an  
45 objective measure of physical activity. This number has been identified to meet statistical  
46 power (see below).

47  
48  
49  
50 **Usual care group:** Following the end of their baseline measures, participants will receive a  
51 cancer prevention leaflet<sup>30</sup>. The study administrator will then notify participants of their  
52  
53  
54

1 randomisation by letter. On completion of their 12 month follow up visit women will be  
2 offered a single personalised coaching session and the ActWELL intervention booklet.  
3

4 **Intervention group:** Following the end of their baseline measures participants will receive  
5 a cancer prevention leaflet<sup>30</sup>. The study administrator will then notify participants of their  
6 randomisation by letter. The Breast Cancer Now volunteer coordinator will allocate a Breast  
7 Cancer Now Lifestyle Coach (LC) to the participant. The LC will contact the participant to  
8 arrange an appointment for their first face to face visit.  
9  
10  
11

### 12 **Blinding**

13  
14 The study team will be blind to the participants' group allocation until completion of the  
15 primary outcome analysis. Exceptions are the trial manager, study administrator, lifestyle  
16 coaches and participants who cannot be blinded owing to the nature of the intervention.  
17  
18  
19

### 20 **Intervention**

21  
22 Initial work focused on optimising the intervention to scale up the previous prototype for a  
23 12 month follow up period. This was developed from the original feasibility study protocol  
24 and using feedback obtained from study participants and lifestyle coaches. Later feedback  
25 came from our recent research study offering a weight management lifestyle intervention to  
26 women attending family history clinics<sup>31</sup> and our newly formed ActWELL public advisory  
27 team. The proposed study builds on existing behaviour change models<sup>32</sup> particularly the  
28 COM-B model<sup>33</sup>. Thus, the intervention aims to incorporate **capability** for effective lifestyle  
29 change combined with **opportunities** for greater physical activity through an emphasis on  
30 walking initiatives and other community facilities (using taxonomy-derived effective  
31 behaviour change techniques<sup>34</sup>) and increased **motivation** for weight management  
32 (through awareness raising within the teachable moment setting).  
33  
34  
35  
36  
37  
38

39 In addition, four formative qualitative focus groups with individuals in the target population  
40 were held to obtain feedback on the prospective 12 month intervention including  
41 refinements on alcohol messaging.  
42  
43  
44

45 **Intervention content:** The initial part of the intervention (months 1 to 3) will focus on  
46 helping achieve 7% of body weight loss (consistent with the lifestyle intervention in the  
47 highly effective Diabetes Prevention Programme<sup>35</sup>) and the remaining months will also  
48 combine techniques for weight loss maintenance (WLM) by addressing both caloric intake  
49 and energy expenditure.  
50  
51

52 Behavioural change techniques (BCT) include goal setting, implementation intentions, self-  
53 monitoring of body weight and feedback. The latter may be particularly important for WLM.  
54  
55

1 This part of the intervention will take a habit-formation based approach using the Ten Top  
2 Tips shown to be successful for WLM over a 2 year period<sup>36</sup>. Social support will be  
3 encouraged throughout the 12 months through regular coach contact and encouragement to  
4 share the intervention with a friend/buddy. The initial introduction to the leisure centre will  
5 also provide an introduction to locally available exercise facilities and classes.  
6  
7

8  
9 Tailored personalised advice is a key component of all aspects of the intervention.  
10 Motivational interviewing about weight loss will be undertaken to identify participant  
11 ambivalence and perceived personal advantages to weight management.  
12  
13

14 The **caloric prescription** will be based on 600kcal below that required for weight  
15 maintenance (calculated using the equations for basal metabolic rate according to gender,  
16 age and body weight).  
17  
18

19 **Food and drink choices** will be based on information obtained from current eating habits  
20 obtained through 24 hour recalls to guide personalised advice on food frequency, portion  
21 sizes and foods to limit. Participant agreed goals (and implementation intentions) will be  
22 used for one specific food or drinking habit and this will be self-monitored with personalised  
23 feedback provided.  
24  
25  
26

27 **Physical activity dose** All participants will undertake the Scottish Physical activity  
28 screening questionnaire (Scot-PASQ)<sup>37</sup> by the coach as an indicator of current activity levels  
29 to help guide the communications about walking plans and signpost other activities  
30 (including those offered in the local leisure centres). Participant agreed pedometer goals  
31 (and implementation intentions) will be used for habitual walking and this will be self-  
32 monitored with personalised feedback provided. Participants will be supported to gradually  
33 increase physical activity towards accumulating at least 150 minutes of moderate intensity  
34 physical activity per week and then, where appropriate, towards 300 minutes per week  
35 (Based on Scottish Intercollegiate Guidelines Network (SIGN)<sup>38</sup> guidance on weight  
36 management.  
37  
38  
39  
40  
41  
42

43 A detailed description of each intervention visit and telephone calls are provided in Appendix  
44 2.  
45  
46

47 **Intervention delivery** There will be two face to face intervention meetings (one of 60  
48 minutes and one of 45 minutes). Over a 12 month period there will be up to nine further  
49 contacts by telephone. The intervention programme will be delivered by Breast Cancer Now  
50 volunteers who have received the training programme to become lifestyle coaches.  
51  
52  
53  
54  
55

1 **Intervention fidelity** We will undertake independent analysis of fidelity to the  
2 intervention. Fidelity of programme delivery and content will be assessed by audio-recording  
3 and transcription from a purposeful sample of approximately 10% of ActWELL lifestyle  
4 coaches including face to face interactions and telephone contacts at each site. A researcher  
5 independent from the intervention delivery will analyse the transcripts and evaluate the  
6 proportion of points covered in each session relative to those described in the intervention  
7 protocol. Time for implementation procedures will be recorded by the lifestyle coaches.  
8  
9  
10

### 11 **Outcome measures**

12  
13  
14 A full list of measurable outcomes is presented in Table 1.  
15  
16  
17  
18  
19  
20  
21  
22  
23  
24  
25  
26  
27  
28  
29  
30  
31  
32  
33  
34  
35  
36  
37  
38  
39  
40  
41  
42  
43  
44  
45  
46  
47  
48  
49  
50  
51  
52  
53  
54  
55  
56  
57  
58  
59  
60

| 1 Primary Outcomes   |                            | Baseline                                                                                                                                           | 12 week | 12 month |
|----------------------|----------------------------|----------------------------------------------------------------------------------------------------------------------------------------------------|---------|----------|
| 2                    |                            |                                                                                                                                                    |         |          |
| 3                    | Body weight                | Measured using digital body weight scales (kg)                                                                                                     | X       | X        |
| 4                    |                            |                                                                                                                                                    |         |          |
| 5                    | Physical Activity          | 7 days accelerometry with ActivPAL (steps)                                                                                                         | X       | X        |
| 6                    |                            |                                                                                                                                                    |         |          |
| 7 Secondary outcomes |                            |                                                                                                                                                    |         |          |
| 8                    |                            |                                                                                                                                                    |         |          |
| 9                    | Modes of physical activity | Scottish Physical Activity Questionnaire SPAQ <sup>34</sup>                                                                                        | X       | X        |
| 10                   | Sedentary behaviour        | 7 days accelerometry with activPAL™ (subsample only)                                                                                               | X       | X        |
| 11                   |                            |                                                                                                                                                    |         |          |
| 12                   | Anthropometric changes     | BMI (height and weight) Waist circumference (cm)                                                                                                   | X       | X        |
| 13                   |                            |                                                                                                                                                    |         |          |
| 14                   | Eating habits              | Questionnaire based on Scottish Health Survey <sup>22</sup>                                                                                        | X       | X        |
| 15                   |                            |                                                                                                                                                    |         |          |
| 16                   |                            | • Fruit and vegetable intake <sup>45</sup>                                                                                                         |         | X        |
| 17                   |                            |                                                                                                                                                    |         |          |
| 18                   |                            |                                                                                                                                                    |         |          |
| 19                   | Alcohol intake             | Audit C questionnaire <sup>46</sup>                                                                                                                | X       | X        |
| 20                   |                            |                                                                                                                                                    |         |          |
| 21                   | Psycho-social variables    | Modified brief illness questionnaire <sup>47</sup>                                                                                                 | X       | X        |
| 22                   |                            | Knowledge and beliefs about lifestyle and breast cancer risk (developed in house)                                                                  | X       | X        |
| 23                   |                            | Psychosocial health measures resources (perceived motivation, awareness, ability, action, monitoring, and social support around weight management) |         | X        |
| 24                   |                            | Perceived body weight (developed in-house)                                                                                                         | x       | x        |
| 25                   |                            |                                                                                                                                                    |         |          |
| 26                   |                            |                                                                                                                                                    |         |          |
| 27                   |                            |                                                                                                                                                    |         |          |
| 28                   |                            |                                                                                                                                                    |         |          |
| 29                   | Economic outcomes          | EQ5D-5L questionnaire <sup>42</sup>                                                                                                                | X       | X        |
| 30                   |                            |                                                                                                                                                    |         |          |
| 31                   |                            | Economic health resource usage (Developed by HERU, University of Aberdeen)                                                                         | X       | X        |
| 32                   |                            |                                                                                                                                                    |         |          |
| 33                   | Cardiovascular risk        | Blood sampling for lipids                                                                                                                          | X       | X        |
| 34                   |                            |                                                                                                                                                    |         |          |
| 35                   |                            | Blood pressure                                                                                                                                     | X       | X        |
| 36                   |                            |                                                                                                                                                    |         |          |
| 37                   | Diabetes risk              | HbA1c                                                                                                                                              | x       | x        |
| 38                   |                            |                                                                                                                                                    |         |          |

39

40

41

42

43

44

45

46

47



1 Data collection will occur at baseline, 12 weeks and 12 months. Data will be collected by the  
2 blinded research nurses from the clinical research centres in each location (trained on the  
3 study protocol) at baseline and 12 months, and over the telephone at 3 months, and  
4 entered directly onto study Case Report Forms and questionnaires. Detailed Standard  
5 Operating Procedures (SOPs) will be provided on each aspect of the protocol to ensure  
6 consistent methodology is used by all staff.  
7  
8  
9

10 At baseline, along with the collection of demographic and background (e.g. menopausal and  
11 smoking status) data by questionnaire, any contraindications to physical activity will also  
12 assessed using the PAR-Q physical activity readiness questionnaire<sup>39,40</sup>. Where required, and  
13 in all women aged 70, participants will be asked to seek advice from their GP before  
14 becoming more physically active. Height will also be measured to the nearest 1mm using a  
15 calibrated stadiometer, with shoes removed, in order to determine BMI and confirm  
16 eligibility.  
17  
18  
19  
20

21 Co-primary outcomes will be change in body weight and change in physical activity by 12  
22 months. Both will be measured as the mean difference between groups at 12 months  
23 adjusted for baseline, site and Scottish Index of Multiple Deprivation (SIMD)<sup>29</sup>. Weight will  
24 be measured to the closest 100g, in light indoor clothing and without shoes, heavy jewellery  
25 or pocket contents, using regularly calibrated electronic scales. Physical activity will be  
26 objectively measured using thigh worn activPAL™ (PAL Technologies Ltd., Glasgow, UK)  
27 accelerometers. These monitors measure free-living sedentary, upright and ambulatory  
28 activity and provide data on step count and time spent sedentary. The devices will be fitted  
29 by the research nurses to ensure correct placement, and the participants will be asked to  
30 wear them at all times (excluding when swimming or bathing) for 8 nights to ensure a full 7  
31 days of recording. A demonstration and instructions will be provided in case removal is  
32 required.  
33  
34  
35  
36  
37  
38  
39

40 Secondary outcomes will be changes in waist circumference, modes (types) of physical  
41 activity, sedentary behaviour, eating habits, alcohol intake, psycho-social variables,  
42 economic outcomes, HbA1C, non-fasting lipids and non-fasting insulin, blood pressure, and  
43 cardiovascular disease risk (incorporating blood pressure and lipid measures).  
44  
45  
46

47 Waist circumference will be measured midway between the iliac crest and lower costal  
48 margin using a Seca 201 measuring tape. Modes of physical activity will be determined from  
49 a 7 day recall questionnaire<sup>41</sup>, and sedentary behaviour from analysis of the activPAL™ data.  
50 Questionnaire based tools will be used to determine eating habits, alcohol intake, psycho-  
51 social variables (e.g. illness perception, knowledge and beliefs about lifestyle and breast  
52  
53  
54  
55

1 cancer risk, and personal health resources e.g. motivation, awareness and social support  
2 around weight management, self-monitoring, and perceived ability to manage weight) (see  
3 Table 1). In order to determine the economic outcomes of the trial, data on health-related  
4 quality of life was collected using the EQ-5D-5L questionnaire<sup>42</sup>, along with questions on  
5 use of NHS health care resources (number of primary care contacts, inpatient, outpatient  
6 and day cases).  
7  
8  
9

10 Blood pressure will be measured using a Microlife 3BTO digital blood pressure monitor, or  
11 other approved BP monitor in the local clinical research facility, with the participant seated  
12 and relaxed. One non-fasted blood sample will be taken per person at both the baseline and  
13 12 month follow up visits in order to measure HbA1C, non-fasting lipids and non-fasting  
14 insulin. Samples will be processed and stored at local clinical research centres and shipped  
15 in batches to Glasgow University laboratories for analysis. All samples will be analysed in a  
16 blinded fashion anonymised fashion at the same time to minimise analytical variation, with  
17 no individual results being made available to participants.  
18  
19  
20  
21  
22

23 Delivery Outcomes: In addition to the intervention delivery time recording and fidelity  
24 assessments described earlier, delivery will be also be evaluated in terms of engagement  
25 (recruitment and retention), using data collected by coaches, exit questionnaires and  
26 through interviews with coaches and participants to record their experiences.  
27  
28  
29

### 30 **Process Evaluation**

31 These measures are aimed at identifying feasibility and acceptability issues pertinent to  
32 decisions about roll-out:  
33  
34

#### 35 a) Breast Screening centres

- 36 • Observations from the waiting room by the research team will be conducted on 2  
37 occasions per site before and after recruitment commences. Data on clinic start and  
38 end times will be noted and mammography staff asked to provide comments relating  
39 to clinic flow.  
40
- 41 • In order to estimate the reach of endorsements by mammographers, we will request  
42 that clinic numbers are obtained (preferably as appointments attended), and track  
43 total ActWELL cards provided to clinics and total cards returned.  
44
- 45 • A sample of mammographers will be invited to participate in individual semi-  
46 structured qualitative interviews (1 interview per site, total n=4) to explore  
47 perceptions and experiences of recruitment, including perceived ease of study  
48 introduction, time burden, positive and negative experiences that have arisen,  
49  
50  
51  
52  
53  
54  
55

1 handling of questions, support from clinic staff and training from research team.  
2 Interviews will be conducted shortly after the end of the study recruitment period  
3 (e.g. September 2018) to enable mammographers to reflect on experiences over the  
4 whole period while recall is still relatively fresh.  
5  
6  
7  
8

9  
10 b) Breast Cancer Now are collecting information on

- 11 • advertising for coaches (where, when and costs),
- 12 • responses to advertising (applications and telephone/email queries)
- 13 • Time and volunteer/coach experience of joint training programme with ActWELL team
- 14 • Volunteer Coach reported problems, queries and reasons for drop out
- 15 • Co-ordinators' experience of managing coaches

16  
17  
18  
19  
20  
21 This data will be used to inform the economic analysis.  
22

23  
24 c) Breast Cancer Now lifestyle coaches will be asked to collect data on participant contacts

- 25 • Number of face to face visits attended
- 26 • Number of phone calls achieved
- 27 • Time taken for each contact
- 28 • Perceived engagement at each contact
- 29 • A sample of coaches from each site (2 per site, total n=8) will be invited to  
30 participate in individual semi-structured qualitative interviews to explore perceptions  
31 and experiences of delivery, including recruitment, training, implementation,  
32 participant contact procedures, perception of intervention acceptability, time  
33 commitments and exit strategies. The interviews will also explore coaches'  
34 perceptions of facilitators and barriers to participant engagement in the programmes.  
35 Interviews will be conducted shortly after the end of the delivery period.  
36  
37  
38  
39  
40  
41  
42  
43  
44

45 d) Leisure centres

- 46 • A sample of 4 Leisure Centre co-ordinators will be invited to participate in individual  
47 semi-structured qualitative interviews to explore their perceptions and experiences of  
48 hosting the coach sessions, including burden, space, time, challenges, and any  
49 potential benefits or negative consequences for the Leisure Centre. Interviews will be  
50 conducted shortly after the end of the delivery period (e.g. May 2019) to enable co-  
51  
52  
53  
54

1                   ordinators to reflect on experiences over the whole period while recall is still  
2                   relatively fresh.  
3

#### 4 e) Participants 5

6                   Semi-structured qualitative interviews will be conducted with 20 intervention participants (5  
7                   per study site) after expression of an interest to participate during the final 12 month visit.  
8                   Interviews will be conducted via telephone. Interviews will be conducted at the end of each  
9                   participant's period of engagement in the study to allow participants to reflect over the  
10                  entire period of their engagement while recall is still relatively fresh. We decided not to  
11                  interview participants during their engagement in the study so as to avoid introducing any  
12                  intervention effects which might have arisen from participants being sensitised to the  
13                  questions and issues under discussion.  
14  
15  
16  
17  
18

19                  A semi-structured interview schedule designed to cover key topics whilst also eliciting  
20                  additional participant perspectives will be used. Interviews will cover participants' views and  
21                  experiences of engaging with the study, including motives for participation and  
22                  understanding of the study purpose; possible impact of the study on attendance for  
23                  screening; perceptions and opinions of the programme content, duration, accessibility  
24                  intensity, recruitment and exit strategy; views of the coaching process and experience of  
25                  setting goals; experiences of attempting to make changes over the 12 month intervention  
26                  period and the facilitators and barriers to making changes. Possible facilitators and barriers  
27                  to be explored include personal beliefs, motivation, family members, social and coach  
28                  support. With the consent of participants, all interviews will be audio-recorded.  
29  
30  
31  
32  
33  
34

## 35 **Statistical considerations** 36

### 37 **Sample size** 38

39                  Body weight: Using the data from the overweight women (BMI > 25 kg/m<sup>2</sup>) in the ActWELL  
40                  feasibility study (mean body weight 80.9± 17.9kg) a total of 414 women (207 per group)  
41                  would be needed to detect a 7% weight change at 90% power. Allowing for 25% drop out  
42                  (based on our findings from the feasibility study) this would mean randomising 552 women.  
43                  Based on feasibility data we estimate that we would need 849 women to express an interest  
44                  in the study which allows for 25% who would be ineligible on grounds of BMI<25kg/m<sup>2</sup> and  
45                  10% who initially express interest then change their minds. The NHSSBSP screens  
46                  thousands of women each year so we do not anticipate any problems with 849 women  
47                  expressing an interest in the study.  
48  
49  
50  
51  
52  
53  
54  
55

1 Physical activity: Given that the activity data from the ActWELL feasibility study was based  
2 on self-report, an objective measurement of steps using pedometers in the predominantly  
3 (80%) female participants of the 'Walking for Wellbeing in the West' study<sup>43</sup> was used to  
4 inform the sample size calculation. At baseline, a mean of 6,802  $\pm$  3,212 steps were  
5 recorded in the intervention group. In order to detect a difference of 2,000 steps between  
6 groups at follow-up, at 90% power, 102 women (51 per group) would be required to  
7 complete this aspect of the study using ActivPAL accelerometers (shown to be feasible in  
8 studies of older adults and enabling accurate estimates of activity and sedentary  
9 behaviour<sup>44</sup>). Allowing for 20% drop out plus any equipment malfunction/postal losses we  
10 would recruit a further 30% bringing the total enrolment to 146 of the 552 participants for  
11 this aspect of the study. In summary a sub-sample of 146 the 552 women recruited above  
12 will be asked to wear the accelerometers.  
13  
14  
15  
16  
17  
18

### 19 **Quantitative analysis**

20  
21 Statistical analysis of outcomes will be undertaken by statisticians at Tayside Clinical Trials  
22 Unit (TCTU). In the main analysis we will use an intention to treat analysis with all available  
23 data. We will undertake multiple linear regression analyses with mixed effects models  
24 adjusted for the corresponding baseline values with group allocation and site as fixed  
25 effects. For the primary outcomes we will also undertake a sensitivity analysis using both  
26 repeated measures and multiple imputations for missing values.  
27  
28  
29  
30

31 We do not anticipate that clustering effects will be a substantial issue in ActWELL, which is  
32 why we have designed the trial as individually randomised. We anticipate 24 or more Breast  
33 Cancer Now lifestyle coaches delivering the intervention, making each cluster small at  
34 around 10 participants. It is possible that even more lifestyle coaches will be involved  
35 depending on the capacity of BCN. We also anticipate that participants will be evenly  
36 distributed across the four breast screening centres rather than having a dominant centre.  
37 We will, however, look for evidence of clustering effects as a secondary analysis and present  
38 and interpret our results in light of this analysis.  
39  
40  
41  
42  
43

### 44 **Missing data**

45  
46 The extent of missing data will be examined and, if necessary, methods such as multiple  
47 imputation will be implemented to provide robust results, assuming data are missing at  
48 random (MAR). We will examine the extent of missing data by considering the differences  
49 between those with complete data and those with missing and if they are similar we will  
50 assume data is missing completely at random (MCAR). If they do differ we will assume MAR  
51 and use multiple imputations and compare with the primary analysis. We will try to obtain  
52  
53  
54  
55

1 reasons for missing data during the trial and if the probability of missing data is related to  
2 the outcome then data may be not missing at random (NMAR). If this looks likely, then  
3 mechanisms of missingness and outcomes will be modelled together.  
4  
5  
6  
7

### 8 **Qualitative analysis**

9  
10 All interview recordings will be transcribed in full for analysis. Transcripts will be coded for  
11 thematic analysis, with the coding themes to be agreed among the researchers based on the  
12 core questions and topic areas, including any new and emerging themes. The reliability of  
13 the themes will then be reassessed by a process of familiarisation with the transcript texts.  
14 Discussions between researchers will enable identification of emerging themes and  
15 resolution of interpretive difference.  
16  
17  
18

### 19 **Cost effectiveness analysis**

20 Intervention Costs data will be collected by health economics team including  
21  
22

- 23 • Breast Cancer Now costs (co-ordinator salary, training, transport)
  - 24 • Intervention consumable costs (training packs and participant materials)
  - 25 • Intervention delivery staff costs (coach training, mentoring and overseeing costs)
- 26  
27  
28  
29

30 The cost-effectiveness analysis of the ActWELL intervention compared with usual care will be  
31 based on resource use and outcomes (EQ-5D-5L) data<sup>42</sup> (collected from participant's  
32 questionnaires and telephone interviews). This will take the format of a within-trial cost-  
33 effectiveness analysis and use a cost-utility analysis framework. The effects of the ActWELL  
34 intervention will be estimated as gain in quality-adjusted life years (QALYs) at 12 months  
35 using EQ-5D-5L data collected at baseline, 3 and 12 months. Estimates of cost-effectiveness  
36 will be expressed as the incremental cost per QALY gained (over 12 months).  
37  
38  
39  
40

### 41 **Public Advisory Group**

42 The public advisory group will be involved in every aspect of the trial. This is particularly  
43 important with respect to issues including inequalities, access to intervention, recruitment,  
44 perspectives on written, verbal and e-communications, interpretation of qualitative data and  
45 dissemination events. The group consists of 3 patient representatives from breast screening  
46 attendees recruited by Breast Cancer Now plus a patient advisor on the investigation team  
47 (who will chair the public advisory group).  
48  
49  
50  
51  
52  
53  
54  
55  
56  
57  
58  
59  
60

## DISCUSSION

This paper describes the protocol for an RCT to determine the effectiveness and cost effectiveness of a weight management intervention targeted at women aged between 50 and 70 years of age who are invited to attend routine breast screening clinics. This is consistent with the concept that “every healthcare contact is a health improvement opportunity” as embodied within NHS Scotland’s health promoting health service<sup>48</sup>.

Current epidemiological evidence highlights adult weight gain, excess body fat, low levels of physical activity and alcohol intake as modifiable factors associated with an increased risk of developing postmenopausal breast cancer<sup>3</sup>. The NHS Breast Screening setting is one of only a few nationwide opportunities that offers face to face contact by a health professional to over 70% of (healthy) women aged 50 to 70 years including significant numbers of women from deprived areas (>60% of women from SIMD quintile 1 and > than 70% from quintile 2<sup>49</sup>) who may have no other opportunity to access free, personalised lifestyle change support. Few other free, national NHS clinical service provides a routine invitation to reach this number of women in this age group. At present, no support for lifestyle change is provided in this setting although survey and intervention work highlights the potential for engagement and behaviour change<sup>19,28</sup>. Recent work undertaken in Scotland in routine breast screening clinics has reported that a simple women’s magazine intervention about breast cancer risk produced by The Scottish Cancer Prevention Network resulted in 60% of respondents claiming an increased knowledge about breast cancer, lifestyle and motivation to find out more about cancer prevention with 40% of respondents expressing intentions to make lifestyle changes<sup>50</sup>. It was notable that there was no difference in results by social position. Whilst concerns have been raised about the potential for increasing health inequalities through individual level interventions, a recent Cochrane review has reported that individual obesity management interventions (in both children and adults) do not increase health inequalities<sup>51</sup>.

Whilst the current trial has primary outcomes of increased physical activity and weight loss, the programme will target energy expenditure (caloric usage in physical activity) and dietary intake (caloric intake from foods, soft and alcoholic drinks). The length of the study is designed to embrace the principles of weight loss and weight loss maintenance and therefore has the potential to achieve a long term change in lifestyle habits. The study has been developed from a well conducted feasibility trial with positive indicative outcomes and utilises a gold standard multi-centre, randomised control design methodology. The development of the intervention is a unique combination of staff from academia, NHS, breast cancer charity and healthy screening attendees and employs a novel approach to



1 deliver weight management by volunteers in community locations. The study is not powered  
2 to assess long term risk of breast cancer and indeed the intervention would need to  
3 demonstrate effective weight loss prior to investment in a cancer outcomes trial. There have  
4 been no trials of primary prevention of breast cancer using a weight management  
5 intervention (largely due to length of follow up and study size). However, there are a  
6 number of ongoing trials of weight management interventions in women with a breast  
7 cancer diagnosis which will report on cancer and all-cause mortality end points (as described  
8 by Demark-Wahnefried et al<sup>52</sup>).  
9  
10  
11  
12

13 It should be noted that the trial is also designed to collect information relevant for clinicians  
14 and policy makers responsible for considerations about the potential roll out of the  
15 programme throughout the national NHS breast screening programme drawing on feedback  
16 from screening staff and participants. This trial is highlighted within the National Cancer  
17 Strategy as an investment from Scottish government in cancer prevention<sup>53</sup>. The  
18 programme may also have salience internationally where population based breast cancer  
19 screening programmes are offered.  
20  
21  
22  
23  
24  
25  
26  
27  
28  
29  
30  
31  
32  
33  
34  
35  
36  
37  
38  
39  
40  
41  
42  
43  
44  
45  
46  
47  
48  
49  
50  
51  
52  
53  
54  
55  
56  
57  
58  
59  
60



1  
2  
3  
4  
5  
6  
7  
8  
9  
10  
11  
12  
13  
14  
15  
16  
17  
18  
19  
20  
21  
22  
23  
24  
25  
26  
27  
28  
29  
30  
31  
32  
33  
34  
35  
36  
37  
38  
39  
40  
41  
42  
43  
44  
45  
46  
47  
48  
49  
50  
51  
52  
53  
54  
55  
56  
57  
58  
59  
60

**Figure Legend**

Figure 1 Study Flow Chart

For peer review only

## REFERENCES

1. <https://www.isdscotland.org/Health-Topics/Cancer/Publications/2016-05-17/2016-05-17-Cancer-Incidence-Summary.pdf> Accessed 15.01.18.
2. <http://www.isdscotland.org/Health-Topics/Cancer/Publications/2015-08-18/2015-08-18-Cancer-Incidence-Projections-Report.pdf> Accessed 15.01.18.
3. <https://www.wcrf-uk.org/uk/preventing-cancer/cancer-preventability-statistics/breast-cancer> Accessed 15.01.18.
4. World Cancer Research Fund International / American Institute for Cancer Research. Continuous Update Project Report: Diet, Nutrition, Physical Activity and Breast Cancer, 2017. Available at: [wcrf.org/breast-cancer-2017](http://wcrf.org/breast-cancer-2017) Accessed 15.01.18.
5. Eliassen AH, Colditz GA, Rosner B, Willett WC, Hankinson SE. Adult weight change and risk of postmenopausal breast cancer JAMA 2006 Jul 12;296(2):193-201.
6. Ahn J, Schatzkin A, Lacey Jr JV, et al. Adiposity, adult weight change, and postmenopausal breast cancer risk. Archives of Internal Medicine. 2007 167(19):2091.
7. Emaus MJ, van Gils CH, Bakker MF, et al. Weight change in middle adulthood and breast cancer risk in the EPIC-PANACEA study. Int. J. Cancer 2014 135; 2887–2899.
8. Neuhauser ML, Aragaki AK, Prentice RL et al. Overweight, Obesity, and Postmenopausal Invasive Breast Cancer Risk: A Secondary Analysis of the Women’s Health Initiative Randomized Clinical Trials. 2015 JAMA oncology 1 (5) 611-621.
9. Hastert TA, Beresford SAA, Patterson RE, Alan R. Kristal AR, White E. Adherence to WCRF/AICR cancer prevention recommendations and risk of postmenopausal breast cancer. Cancer Epidemiol Biomarkers Prev 2013 22:1498-1508.
10. Kohler LN, Garcia DO, Harris RB, Oren E, Roe DJ, Jacobs ET. Adherence to Diet and Physical Activity Cancer Prevention Guidelines and Cancer outcomes: A systematic review. Cancer Epidemiol Biomarkers Prev. 2016 Jul; 25(7):1018-28.
11. Byers T, Sedjo RL: Does intentional weight loss reduce cancer risk? Diabetes Obes Metab 2011 13(12):1063-72.
12. Schauer DP, Feigelson HS, Koebnick C, et al. Bariatric Surgery and the Risk of Cancer in a Large Multisite Cohort. Ann Surg. 2017 Sep 21.

- 1 13. Lauby-Secretan B, Scoccianti C, Loomis D, et al. Body Fatness and Cancer--Viewpoint of  
2 the IARC Working Group. *N Engl J Med*. 2016 Aug 25;375(8):794-8.
- 3
- 4 14. Lean ME, Leslie WS, Barnes AC, et al. Primary care-led weight management for remission  
5 of type 2 diabetes (DiRECT): an open-label, cluster-randomised trial. *Lancet*. 2017 Dec 4.
- 6
- 7 15. Owens C, Conaghan PG. Improving joint pain and function in osteoarthritis. *Practitioner*.  
8 2016 Dec; 260(1799):17-20.
- 9
- 10
- 11 16. [http://www.isdscotland.org/Health-Topics/Cancer/Publications/2017-04-25/2017-04-25-](http://www.isdscotland.org/Health-Topics/Cancer/Publications/2017-04-25/2017-04-25-SBSP-Cancer-Report.pdf)  
12 [SBSP-Cancer-Report.pdf](http://www.isdscotland.org/Health-Topics/Cancer/Publications/2017-04-25/2017-04-25-SBSP-Cancer-Report.pdf).
- 13
- 14
- 15 17. Fisher B, Dowding D, Pickett KE, Fylan F. Health promotion at NHS breast cancer  
16 screening clinics. *Health Promotion Int*. 2007, 22(2):137-45.
- 17
- 18 18. Fisher BA, Wilkinson L, Valencia A. [Women's interest in a personal breast cancer risk](#)  
19 [assessment and lifestyle advice at NHS mammography screening](#). *J Public Health (Oxf)*.  
20 2017 Mar 1;39(1):113-121.
- 21
- 22
- 23 19. Anderson AS, Mackison D, Boath C, Steele RJC. Promoting changes in diet and physical  
24 activity in breast and colorectal cancer screening settings- an unexplored opportunity for  
25 endorsing healthy behaviours. *Cancer Prev Res (Phila)*. 2013 Mar;6(3):165-72.
- 26
- 27
- 28 20. Eccles SA, Aboagye EO, Ali S, et al. Critical research gaps and translational priorities for  
29 the successful prevention and treatment of breast cancer. *Breast Cancer Res*. 2013 Oct  
30 1;15(5):R92.
- 31
- 32
- 33 21. Howell A, Anderson AS, Clarke RB, et al. Risk determination and prevention of breast  
34 cancer. *Breast Cancer Res*. 2014 Sep 28;16(5):446.
- 35
- 36
- 37 22. [Scottish Government \(2017\). Scottish Health Survey: Main Report \[online\]. Available at:](#)  
38 <http://www.gov.scot/Publications/2017/10/2970/downloads>. Accessed 15 Jan 2018.
- 39
- 40
- 41 23. NICE Weight management: lifestyle services for overweight or obese adults. Public health  
42 guideline [PH53] <https://www.nice.org.uk/guidance/ph53>.
- 43
- 44 24. William H Dietz, Louise A Baur, Kevin Hall, Rebecca M Puhl, Elsie M Taveras, Ricardo  
45 Uauy, Peter Kopelman. *Lancet obesity series 5. Management of obesity: improvement of*  
46 *health-care training and systems for prevention and care*. vol 385, June 20, 2015.
- 47
- 48
- 49 25. <http://www.nsd.scot.nhs.uk/services/screening/breastscreening/index.html>
- 50
- 51 26. <http://www.isdscotland.org/Health-Topics/Cancer/Breast-Screening/>
- 52
- 53
- 54
- 55
- 56
- 57
- 58
- 59
- 60

- 1 27. Anderson AS, Macleod M, Mutrie N et al. Breast cancer risk reduction - is it feasible to  
2 initiate a randomised controlled trial of a lifestyle intervention programme (ActWELL)  
3 within a national breast screening programme? *Int J Behav Nutr Phys Act*. 2014 Dec  
4 17;11:156.
- 7 28. Conway E, Wyke S, Sugden J, Mutrie N, Anderson AS, ActWELL team. Can a lifestyle  
8 intervention be offered through NHS breast cancer screening? Challenges and  
9 opportunities identified in a qualitative study of women attending screening. *BMC Public*  
10 *Health*. 2016 Aug 11;16(1):758.
- 13 29. Scottish Government, Scottish Index of Multiple Deprivation  
14 <http://www.scotland.gov.uk/Topics/Statistics/SIMD/> Last accessed 19/01/2018.
- 17 30. Breast Cancer Now (2017) Breast cancer risk the Facts.  
18 [http://breastcancernow.org/sites/default/files/public/risk\\_booklet\\_pdf\\_final\\_sept\\_2015\\_1.](http://breastcancernow.org/sites/default/files/public/risk_booklet_pdf_final_sept_2015_1.pdf)  
19 [pdf](http://breastcancernow.org/sites/default/files/public/risk_booklet_pdf_final_sept_2015_1.pdf). Last accessed 30/3/17.
- 22 31. Anderson AS, Dunlop J, Gallant S, et al. Feasibility study to assess the impact of a  
23 lifestyle intervention ('LivingWELL') in people having an assessment of their family history  
24 of colorectal or breast cancer. *BMJ Open*. 2018 Feb 1;8(2).
- 27 32. Michie S, Abraham C, Whittington C, McAteer J, Gupta S: Effective Techniques in Healthy  
28 Eating and Physical Activity Interventions: A Meta-Regression. *Health Psychol*. 2009  
29 Nov;28(6):690-701.
- 32 33. Michie, S, van Stralen MM, West, R. The behaviour change wheel: a new method for  
33 characterising and designing behaviour change interventions. *Implementation Science*  
34 2011 6:42.
- 37 34. Michie S, Ashford S, Sniehotta FF, Dombrowski SU, Bishop A, French DP. A refined  
38 taxonomy of behaviour change techniques to help people change their physical activity and  
39 healthy eating behaviours: The CALO-RE taxonomy. *Psychol Health*. 2011  
40 Nov;26(11):1479-98.
- 43 35. Diabetes Prevention Programme Research Group Reduction in the Incidence of Type 2  
44 Diabetes with Lifestyle Intervention or Metformin *NEJM* 2002 346 393-403.
- 47 36. Beeken RJ, Leurent B, Vickerstaff V, et al. A brief intervention for weight control based on  
48 habit-formation theory delivered through primary care: results from a randomised  
49 controlled trial. *Int J Obes (Lond)* 2017 Feb; 41(2):246-254.

- 1 37. Physical Activity and Health Alliance. Scottish physical activity screening question (Scot-  
2 PASQ). 2013. Available at: [http://www.paha.org.uk/Resource/scottish-physical-activity-  
4 screening-question-scot-pasq](http://www.paha.org.uk/Resource/scottish-physical-activity-<br/>3 screening-question-scot-pasq). Accessed 30/03/18.
- 5  
6 38. Scottish Intercollegiate Guidelines Network (SIGN) Management of Obesity – a national  
7 clinical guidelines 115 2010 Royal College of Physicians Edinburgh.
- 8  
9 39. Thomas S1, Reading J, Shephard RJ. Revision of the Physical Activity Readiness  
10 Questionnaire (PAR-Q). *Can J Sport Sci*. 1992 Dec;17(4):338-45.
- 11  
12 40. Goodman JM, Thomas SG, Burr J. Evidence-based risk assessment and recommendations  
13 for exercise testing and physical activity clearance in apparently healthy individuals. *Appl  
14 Physiol Nutr Metab*. 2011 Jul;36 Suppl 1: S14-32.
- 15  
16 41. Lowther M, Mutrie N, Loughlan C, McFarlane C. Development of a Scottish physical  
17 activity questionnaire: a tool for use in physical activity interventions. *Br J Sports Med*.  
18 1999 Aug;33(4):244-9.
- 19  
20 42. The EuroQol Group. EuroQol-a new facility for the measurement of health-related quality  
21 of life. *Health Policy*. 1990 Dec;16(3):199-208.
- 22  
23 43. Baker G, Gray SR, Wright A, Fitzsimons C, Nimmo M, Lowry R, Mutrie N; Scottish  
24 Physical Activity Research Collaboration (SPARColl). The effect of a pedometer-based  
25 community walking intervention "Walking for Well Being in the West" on physical activity  
26 levels and health outcomes: a 12 week randomised controlled trial. *2010 Int J Behav Nutr  
27 Phys Act* 7:51.
- 28  
29 44. [Mutrie N](#), [Doolin O](#), [Fitzsimons CF](#), [Grant PM](#), [Granat M](#), [Grealy M](#), [Macdonald H](#),  
30 [MacMillan E](#), [McConnachie A](#), [Rowe DA](#), [Shaw R](#), [Skelton DA](#). "Increasing older adults'  
31 walking through primary care: results of a pilot randomized controlled trial." *2012 Family  
32 Practice* 29 (6): 633-642.
- 33  
34 45. Cappuccio FP, Rink E, Perkins-Porras L, McKay C, Hilton S, Steptoe A. Estimation of fruit  
35 and vegetable intake using a two-item dietary questionnaire: a potential tool for primary  
36 health care workers. *Nutr Metab Cardiovasc Dis*. 2003 Feb;13(1):12-9.
- 37  
38 46. Bush K, Kivlahan DR, McDonnell MB, Fihn SD, Bradley KA. The AUDIT alcohol consumption  
39 questions (AUDIT-C): an effective brief screening test for problem drinking. Ambulatory  
40 Care Quality Improvement Project (ACQUIP). Alcohol Use Disorders Identification Test.  
41 *Arch Intern Med*. 1998 Sep 14;158(16):1789-95.
- 42  
43 47. Broadbent E1, Petrie KJ, Main J, Weinman J. The Brief Illness perception questionnaire. *J  
44 Psychosom Res*. 2006 Jun;60(6):631-7.

- 1 48. Health Promoting Health Service Service- NHS Health Scotland. Overview (2009).  
2 [www.healthscotland.com/documents/4128.aspx](http://www.healthscotland.com/documents/4128.aspx).  
3
- 4 49. <http://www.isdscotland.org/Health-Topics/Cancer/Breast-Screening/>.  
5
- 6 50. Macleod M, Anderson AS [Cancer prevention-the feasibility and acceptability of promoting](#)  
7 [breast cancer risk reduction in the screening setting through a lifestyle magazine](#). Eur J  
8 Cancer Care 2018 27(2):e12823.  
9
- 10 51. [Bambra CL](#) , [Hillier FC](#) , [Cairns JM](#) , [Kasim A](#) , [Moore HJ](#) , [Summerbell CD](#) How effective  
11 are interventions at reducing socioeconomic inequalities in obesity among children and  
12 adults? Two systematic reviews. 2015 NIHR Journal Library  
13 <https://www.ncbi.nlm.nih.gov/pubmedhealth/PMH0091702/>.  
14  
15  
16
- 17 52. Demark-Wahnefried W, Schmitz KH, Alfano CM, Bail JR, Goodwin PJ, Thomson CA,  
18 Bradley DW, Courneya KS, Befort CA, Denlinger CS, Ligibel JA, Dietz WH, Stolley MR, Irwin  
19 ML, Bamman MM, Apovian CM, Pinto BM, Wolin KY, Ballard RM, Dannenberg AJ, Eakin EG,  
20 Longjohn MM, Raffa SD, Adams-Campbell LL, Buzaglo JS, Nass SJ, Massetti GM, Balogh EP,  
21 Kraft ES, Parekh AK, Sanghavi DM, Morris GS, Basen-Engquist K. Weight management and  
22 physical activity throughout the cancer care continuum CA Cancer J Clin 2018 68(1) 64-89.  
23  
24  
25  
26
- 27 53. Scottish Government (2016) Beating Cancer: Ambition and Action Scottish Government  
28 <http://www.gov.scot/Publications/2016/03/9784>.  
29  
30  
31  
32  
33  
34  
35  
36  
37  
38  
39  
40  
41  
42  
43  
44  
45  
46  
47  
48  
49  
50  
51  
52  
53  
54  
55  
56  
57  
58  
59  
60

Figure 1 Study Flow Chart

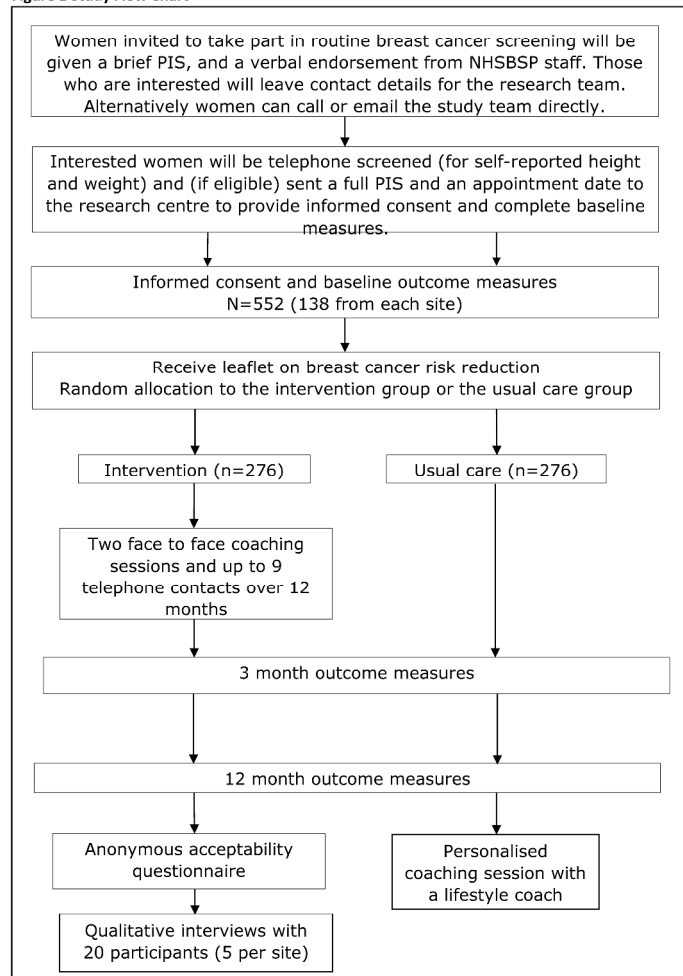

## Appendix 1

### PRECIS – 2 for ActWELL

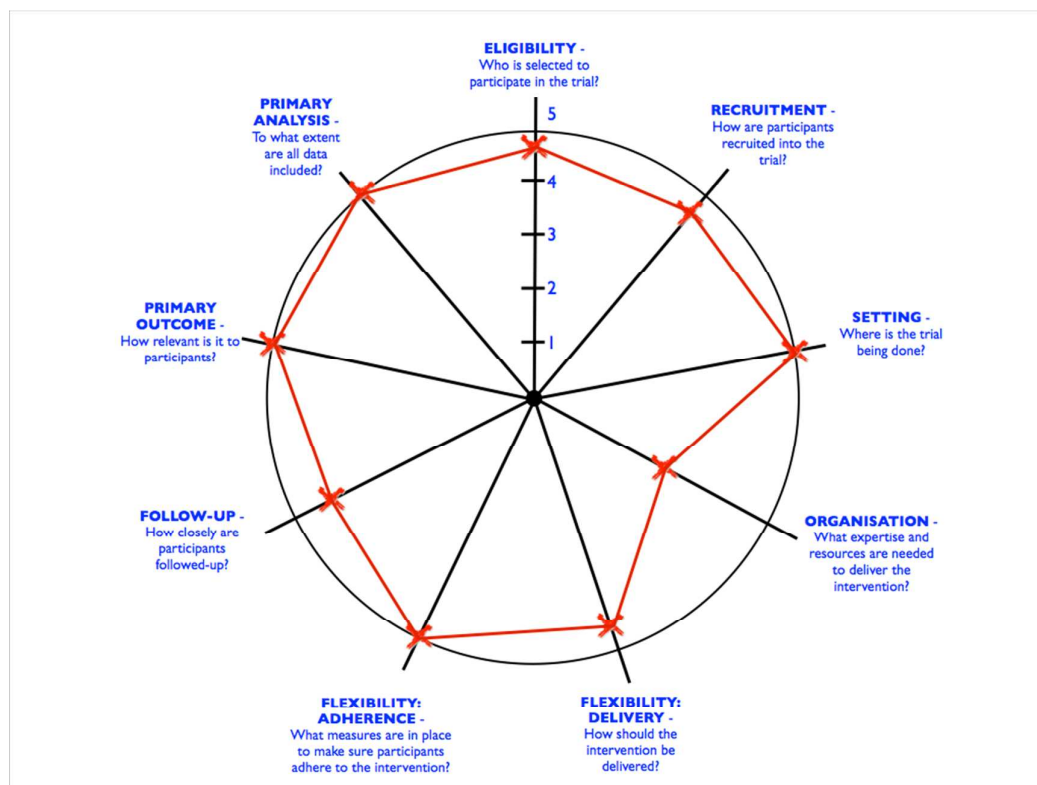

#### PRECIS-2 wheel for the ActWELL trial.

The trial aims to be highly pragmatic in design approach, which is reflected in the wheel with the exception of the *Organisation* domain. The ActWELL intervention involves a new way of delivering lifestyle counselling (Breast Cancer Now volunteers) so the trial is more explanatory on this domain. Evaluating this mode of delivery is, however, the aim of the trial and should the intervention prove effective, the trial would provide support for involving the voluntary sector in routine delivery of the ActWELL intervention.

More information on PRECIS-2 is available at <https://www.precis-2.org> and in Loudon K, Treweek S, Sullivan F, Donnan P, Thorpe KE, Zwarenstein M. The PRECIS-2 tool: designing trials that are fit for purpose. *BMJ* 2015; 350: h2147–7.



## Appendix 2

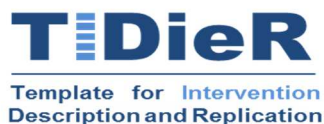

## The TIDieR (Template for Intervention Description and Replication) Checklist\*:

### 1. Brief Name

ActWELL

### 2. WHY

Following the COM-B model the intervention aims to incorporate increased **Motivation** for weight management (through awareness raising within the teachable moment setting) combined with increased **Capability** for effective lifestyle change combined with **Opportunities** for greater physical activity through an emphasis on walking initiatives and other community facilities using taxonomy-derived effective behaviour change techniques.

### 3. WHAT

#### a) Materials

##### Visit 1

- Touch, Look Check leaflet ([http://breastcancer.org/sites/default/files/public/tlc\\_breast\\_awareness\\_guide.pdf](http://breastcancer.org/sites/default/files/public/tlc_breast_awareness_guide.pdf))
- Breast cancer and lifestyle FAQ and links to science base (WCRF) (in house developed)
- BMI chart to identify BMI number and weight status (NHS)
- Assessing baseline step count (in house developed)
- Physical activity recommendations from UK Department of Health
- Kettlecise ways to reduce sedentary behaviour (<http://www.cancerpreventionscotland.org.uk/resources/kettlecise/>)
- Warm up exercises (in house developed)
- Walking Plan and Diary (in house developed)
- Implementation intention sheets (in house developed)
- Information sheet on calories and alcohol infographic <https://www.behance.net/gallery/5830267/Calories-Alcohol-infographic>
- Sugar savvy quiz <https://www.wcrf-uk.org/sites/default/files/are-you-sugar-savvy-game.pdf>
- Weight awareness plan (weekly weight logbook) (in house developed)
- Five day food and drink diary (in house developed)

##### Visit 2

- Eatwell Guide (NHS Tayside)
- Personalised weight loss plan (British heart Foundation)

- Implementation Intentions sheet (in house developed)
- Portion distortion quiz
- Food Labelling Guidance – credit card size (NHS Tayside)
- British Heart Foundation Booklet ‘Your simple guide to weight loss’  
<https://www.bhf.org.uk/publications/healthy-eating-and-drinking/facts-not-fads---your-simple-guide-to-healthy-weight-loss>

## b) Procedures

Overall: Two face to face visits plus nine monthly phone calls

### Visit 1 (60 minutes)

- Check well-being
  - Self-identification of BMI
  - Instruct participant on pedometer use and proposed walking programme
  - Walk and talk 10 min  
(interactive walking session and discussion about increasing physical activity)
  - Physical activity goal setting  
(implementation intention setting and personalised walking programme)
  - Discuss how to reduce sedentary behaviour
  - Caloric value of (hot and cold) alcohol and sugary drinks discussed  
 “Sugar Savvy” quiz undertaken (<https://www.wcrf-uk.org/sites/default/files/are-you-sugar-savvy-game.pdf>)  
 (advice given on alternatives, portion size, frequency)  
 (Possibility of implementation intention setting on drinks)
  - Weight loss goal  
(emphasis on modest up to 7% in 12 months)
  - Motivational interviewing questions on weight loss
  - Guidance on weekly self-weighing, reporting and feedback–  
(implementation intention setting for weighing– scales available for home use)
  - Initial dietary challenges – snacking and “weakness foods”  
(based on a verbal 24 hour intake)
  - Summarise meeting – goals set, times of relapse
- All participants invited to undertake a 24 hour written diet recall for 5 days for review at visit 2

### Visit 2 (45 minutes)

- Check well being
- Praise success (however modest)
- Evaluate and appraise PA goals  
(Discuss how they feel physically and mentally about success of walking, or problems and possible solutions, review goals)
- Check body weight recorded

- Reminder about body weight and breast cancer risk reduction (even after 50)
- Highlight weight loss principles  
(revising snacking, importance of meal patterns and 5 a day)
- Remind about goal set for weight loss and how this converts to personal eating plan
- Review 24 hour diet recall sheets (handed out last visit)  
(or take a 24 hour recall if sheets not completed)
- Discuss calories – focus on -600kcal deficit diet  
(Identify personalised eating plan using British Heart Foundation (BHF) materials)
- Discuss Portion sizes and frequencies  
(use images from BHF materials and portion distortion information)
- Food labelling  
(Identify energy values for low and high, advise avoiding red TL, advise using at home)
- Identify Implementation intentions on one food/drinking habit  
(set one only- if suggestions needed base on 24 hour recordings)
- Summarise goals and key challenges, check all materials provided
- Arrange first two telephone appointments
- Discuss leisure centre activity to meet staff (if interested)

### Phone Calls

#### For all calls:

- Check well being
- Check goal progress, self-reported weight, re-enforce the importance of self-monitoring
- Identify success and challenges
- Discuss possible problems ahead (e.g. holidays)
- Coping strategies and starting again if intentions failed
- Start discussion on the importance of habits in eating behaviours using Ten Top Tips.

#### Weight Loss and Weight Loss Maintenance (using Ten Top Tips)

- Stress the importance of physical activity and social support Refer to *Tips Walk off the weight (TC1)*
- Highlight the role of lower calorie and lower fat foods Refer to *Go Reduced Fat and Look at the Labels (TC2)*
- Highlight the importance of regular food intake (including breakfast) and portion size Refer to *Keep to your meal routine and Focus on Food (TC3)*
- Stress the importance of physical activity and social support Refer to *Tips Walk off the weight (TC4)*
- Re-enforce information on snacking Refer to *Pack a Healthy snack and Five a Day (TC5)*
- Re-enforce information on drinks sweet and alcohol and value of water Refer to *Think about your drinks (TC6)*

- Re-evaluate portions size (as per BHF booklet) Refer to *Caution with your portions*(TC7)
- (TC 8) return to discussing physical activity and reducing sedentary behaviour Refer to *Up on your feet*
- Re-evaluation of goals, where next , summarise success (TC9)

#### 4. WHO PROVIDED

The intervention will be delivered by Breast Cancer Now Volunteer coaches. These will have a background and experience of counselling and receive a bespoke training programme by the research team including

- Evidence base for reducing risks of breast cancer by lifestyle
- Key principles and application of healthy food and drinks choices, appropriate portions and coping with social consumption challenges
- Key principles and application of increased physical activity and reduced sedentary behaviour
- Key principles and application of weight management
- Personalisation of advice
- Motivational interviewing techniques (key questions only)
- Use of evidence-based behavioural change techniques (BCTs)
- Handling confidential data
- The intervention protocol and importance of its delivery. Confidentiality.
- Role play and assessments (face to face and telephone contact)
- 

The programme is likely to be delivered over 4 bespoke sessions training programme. An exit certificate will be provided for those who successfully achieve the assessments and role play.

Role play and observations will be undertaken prior to commencing the actual intervention.

#### 5. HOW

Two individual 1:1 coach to participant face to face visits are planned (approx. 6 weeks apart) with monthly telephone contacts thereafter.

#### 6. WHERE

The face to face visits are scheduled to take part in office space in local leisure centres. Each town has identified more than one possible venue and these will be noted. No home visits are scheduled and other locations are discouraged.

#### 7. WHEN and HOW MUCH

1  
2  
3 The coaches will collect data for each participant on; date of contact, duration of contact  
4 and perceived engagement for both face to face and 9 telephone contacts. Other contacts  
5 e.g. SMS/email will also be noted. These data will allow dose and duration and outcomes to  
6 be assessed by individual coaches as well as overall.  
7

## 8 **8. TAILORING**

9 Personalised advice is a key component of all aspects of the intervention. Motivational  
10 interviewing about weight loss will be undertaken to identify participant ambivalence and  
11 perceived personal advantages to weight management.  
12

13 **Caloric prescription:** this will be based on -600kcal required for weight maintenance  
14 (calculated using the equations from Mifflin St Jeor according to gender, age and body  
15 weight). Participant agreed goals (and implementation intentions) will be used for weighing  
16 and recording body weight (self-monitoring) and personalised feedback will be provided.  
17

18 **Food and drink choices** will be based on information obtained from current eating habits  
19 obtained through 24 hour recalls to guide personalised advice on food frequency, portion  
20 sizes and foods to limit. Participant agreed goals (and implementation intentions) will be  
21 used for one specific food or drinking habit and this will be self monitored with personalised  
22 feedback provided.  
23

24 **Physical activity dose** and duration will be based on the brief Scottish Physical Activity  
25 questionnaire to guide walking plans and signpost other activities (including those offered in  
26 the local leisure centres). Participant agreed goals (and implementation intentions) will be  
27 used for one specific aspect of habitual walking and this will be self- monitored with  
28 personalised feedback provided  
29

## 30 **9. MODIFICATIONS**

### 31 **Recommendations for modifications may arise from**

- 32 a) Feedback from coaches (individual issues or during regular round table meetings)
  - 33 b) Changes in evidence base for guidance
  - 34 c) Adverse events
- 35  
36

## 37 **10. HOW WELL**

38 **Fidelity Procedures:** We will undertake qualitative process measures to assess fidelity to  
39 the intervention. Time for implementation procedures will be recorded by intervention staff.  
40 Fidelity of programme delivery and content will be assessed by audio-recording and  
41 transcription of a random sample of LC face to face interactions and telephone contacts at  
42 each site. These will be compared to the protocol specified number of points to be covered  
43 in each session by a researcher at University of Stirling independent from the intervention.  
44  
45  
46  
47  
48  
49  
50  
51  
52  
53  
54  
55  
56  
57  
58  
59  
60

1  
2  
3  
4  
5  
6  
7  
8  
9  
10  
11  
12  
13  
14  
15  
16  
17  
18  
19  
20  
21  
22  
23  
24  
25  
26  
27  
28  
29  
30  
31  
32  
33  
34  
35  
36  
37  
38  
39  
40  
41  
42  
43  
44  
45  
46  
47  
48  
49  
50  
51  
52  
53  
54  
55  
56  
57  
58  
59  
60

For peer review only

# BMJ Open

## A randomised controlled trial to assess the impact of a lifestyle intervention (ActWELL) in women invited to NHS breast screening – study protocol

|                                 |                                                                                                                                                                                                                                                                                                                                                                                                                                                                                                                                                                                                                                                                                                                                                                                                                                                                                                                                                                                                                                                                                                                                                                          |
|---------------------------------|--------------------------------------------------------------------------------------------------------------------------------------------------------------------------------------------------------------------------------------------------------------------------------------------------------------------------------------------------------------------------------------------------------------------------------------------------------------------------------------------------------------------------------------------------------------------------------------------------------------------------------------------------------------------------------------------------------------------------------------------------------------------------------------------------------------------------------------------------------------------------------------------------------------------------------------------------------------------------------------------------------------------------------------------------------------------------------------------------------------------------------------------------------------------------|
| Journal:                        | <i>BMJ Open</i>                                                                                                                                                                                                                                                                                                                                                                                                                                                                                                                                                                                                                                                                                                                                                                                                                                                                                                                                                                                                                                                                                                                                                          |
| Manuscript ID                   | bmjopen-2018-024136.R1                                                                                                                                                                                                                                                                                                                                                                                                                                                                                                                                                                                                                                                                                                                                                                                                                                                                                                                                                                                                                                                                                                                                                   |
| Article Type:                   | Protocol                                                                                                                                                                                                                                                                                                                                                                                                                                                                                                                                                                                                                                                                                                                                                                                                                                                                                                                                                                                                                                                                                                                                                                 |
| Date Submitted by the Author:   | 13-Sep-2018                                                                                                                                                                                                                                                                                                                                                                                                                                                                                                                                                                                                                                                                                                                                                                                                                                                                                                                                                                                                                                                                                                                                                              |
| Complete List of Authors:       | Anderson, Annie; University of Dundee, Centre for Research into Cancer Prevention and screening<br>Craigie, Angela; Centre for Research into Cancer Prevention and Screening, Medical Research Institute, University of Dundee<br>Gallant, Stephanie; University of Dundee, School of Medicine<br>McAdam, Chloe; University of Edinburgh, Institute for Sport, Physical Education & Health Sciences<br>Macaskill, E. ; NHS Tayside, Department of Breast Surgery<br>Mutrie, Nanette; University of Edinburgh, Chair of Physical Activity for Health University of Edinburgh College of Humanities and Social Science<br>Institute for Sport, Physical Education and Health Sciences St Leonard's Land Holyrood Road Edinburgh EH8 8AQ<br>Neilson, Aileen; University of Aberdeen, Health Economics Research Unit<br>O'carroll, Ronan; University of Stirling,<br>Rauchhaus, Petra; University of Dundee, Tayside Clinical Trials Unit, Tayside Medical Sciences Centre<br>Sattar, Naveed; University of Glasgow, BHF centre<br>Stead, Martine; University of Stirling and the Open University, Institute for Social Marketing<br>Treweek, Shaun; University of Aberdeen, |
| <b>Primary Subject Heading</b>: | Public health                                                                                                                                                                                                                                                                                                                                                                                                                                                                                                                                                                                                                                                                                                                                                                                                                                                                                                                                                                                                                                                                                                                                                            |
| Secondary Subject Heading:      | Public health                                                                                                                                                                                                                                                                                                                                                                                                                                                                                                                                                                                                                                                                                                                                                                                                                                                                                                                                                                                                                                                                                                                                                            |
| Keywords:                       | Cancer prevention, Breast cancer, Screening, Lifestyle, Behaviour modification                                                                                                                                                                                                                                                                                                                                                                                                                                                                                                                                                                                                                                                                                                                                                                                                                                                                                                                                                                                                                                                                                           |
|                                 |                                                                                                                                                                                                                                                                                                                                                                                                                                                                                                                                                                                                                                                                                                                                                                                                                                                                                                                                                                                                                                                                                                                                                                          |

SCHOLARONE™  
Manuscripts

# A randomised controlled trial to assess the impact of a lifestyle intervention (ActWELL) in women invited to NHS breast screening – study protocol

## Authors

Annie S. Anderson<sup>1</sup>, Angela Craigie<sup>1</sup>, Stephanie Gallant<sup>1</sup>, Chloe McAdam<sup>2</sup>, E. Jane Macaskill<sup>3</sup>, Nanette Mutrie<sup>2</sup>, Aileen R Neilson<sup>4</sup>, Ronan E O'Carroll<sup>5</sup>, Petra Rauchhaus<sup>6</sup>, Naveed Sattar<sup>7</sup>, Martine Stead<sup>8</sup>, Shaun Treweek<sup>9</sup>

## Addresses

1. Centre for Research into Cancer Prevention and Screening / Tayside Cancer Centre, Division of Cancer Research, University of Dundee, Level 7, Ninewells Hospital & Medical School, Dundee DD1 9SY, UK [a.s.anderson@dundee.ac.uk](mailto:a.s.anderson@dundee.ac.uk); [a.craigie@dundee.ac.uk](mailto:a.craigie@dundee.ac.uk); [s.gallant@dundee.ac.uk](mailto:s.gallant@dundee.ac.uk)
2. University of Edinburgh, Physical Activity for Health Research Centre, Institute for Sport, Physical Education and Health Sciences, St Leonard's Land, Holyrood Road, Edinburgh, EH8 8AQ, UK [Chloe.Mcadam@ed.ac.uk](mailto:Chloe.Mcadam@ed.ac.uk); [Nanette.mutrie@ed.ac.uk](mailto:Nanette.mutrie@ed.ac.uk)
3. Department of Breast Surgery, NHS Tayside, Ninewells Hospital & Medical School, Dundee, UK, DD1 9SY [ejanemacaskill@nhs.net](mailto:ejanemacaskill@nhs.net)
4. Health Economics Research Unit, Polwarth Building, University of Aberdeen, Foresterhill, AB25 2ZD, UK [aileen.neilson@abdn.ac.uk](mailto:aileen.neilson@abdn.ac.uk)
5. Division of Psychology, School of Natural Sciences, University of Stirling, Stirling, FK9 4LA, UK [ronan.ocarroll@stir.ac.uk](mailto:ronan.ocarroll@stir.ac.uk)
6. Tayside Clinical Trials Unit, Tayside Medical Sciences Centre, Ninewells Hospital and Medical School, Dundee DD1 9SY [P.Rauchhaus@dundee.ac.uk](mailto:P.Rauchhaus@dundee.ac.uk)
7. Institute of Cardiovascular and Medical Sciences, University of Glasgow, Glasgow, G12 8TA, UK [naveed.sattar@glasgow.ac.uk](mailto:naveed.sattar@glasgow.ac.uk)
8. Institute for Social Marketing, University of Stirling, Stirling FK9 4LA, Scotland, UK [martine.stead@stir.ac.uk](mailto:martine.stead@stir.ac.uk)
9. Health Services Research Unit, University of Aberdeen, Health Sciences Building, Foresterhill, Aberdeen, AB25 2ZD, UK [stweek@mac.com](mailto:stweek@mac.com)

## Correspondence to:



1 Professor Annie S. Anderson

2 Centre for Research into Cancer Prevention and Screening

3 Level 7, Mailbox 7,

4 Ninewells Medical School

5 Dundee DD1 9SY

6 Tel: 0044 (0)1382 383299

7 Fax: 0044 (0)1382 632333

8 E mail: [a.s.anderson@dundee.ac.uk](mailto:a.s.anderson@dundee.ac.uk)

9 Word count: Abstract 267 Paper 5650

10  
11  
12  
13  
14  
15  
16  
17  
18  
19  
20  
21  
22  
23  
24  
25  
26  
27  
28  
29  
30  
31  
32  
33  
34  
35  
36  
37  
38  
39  
40  
41  
42  
43  
44  
45  
46  
47  
48  
49  
50  
51  
52  
53  
54  
55  
56  
57  
58  
59  
60

For peer review only

## ABSTRACT

**Introduction** In Scotland, the incidence of breast cancer is predicted to rise significantly in the next few decades and whilst there are measures to support reductions in morbidity and mortality, the breast cancer community is currently exploring preventative opportunities including supporting weight management programmes in post-menopausal women. This study aims to assess the effectiveness and cost-effectiveness of a theory-based, community delivered, minimal contact, weight management (diet, physical activity and behaviour change techniques) programme (ActWELL) in women with a BMI >25 kg/m<sup>2</sup> attending routine breast cancer screening appointments.

**Methods and analysis** The study will be a 4 centre, 1:1 parallel group RCT of a 12 month weight management intervention initiated in breast cancer screening centres, delivered by trained Breast Cancer Now lifestyle coaches in community settings. The intervention programme involves 2 intervention meetings with coaches plus (up to) nine telephone contacts over 12 months. The programme will focus on personalised diet (including alcoholic and sugary drinks) and physical activity habits. Behaviour change techniques include self-monitoring, goal setting, implementation intentions, action and coping plans. The study has a sample size of 414 women with a BMI >25 kg/m<sup>2</sup> attending routine national **NHS** breast cancer screening appointments. Measures will be taken at baseline, 12 weeks and at 12 month follow up, complemented by qualitative interviews exploring perceived acceptability and impact on habitual behaviours. The two co-primary outcomes are mean change in measured body weight and change in physical activity between groups to 12 months. Secondary outcomes are changes in eating habits, alcohol intake, sedentary time, quality of life, waist circumference, lipid, HbA1c and insulin profiles, blood pressure, and cost-effectiveness of the intervention.

**Ethics and dissemination** The protocol has been approved by East of Scotland Research Ethics Committee (17/ES/0073). All participants provide written informed consent. Dissemination will be through peer-reviewed publication and conference presentations.

**Trial registration number** ISRCTN11057518

**Keywords** Cancer prevention, breast cancer, screening, lifestyle, behaviour modification

## Article Summary

### Strengths and limitations of this study

- This work has the potential to provide routine support for weight management for women aged over 50 years
- This study has been developed from a well conducted feasibility trial with positive indicative outcomes
- Multi-centre, randomised control design
- Strong study team combining staff from academia, NHS, breast cancer charity and healthy screening attendees
- Novel approach to deliver weight management by trained in community locations
- The study has a large potential reach with around 73% of ALL women of this age group attending appointments including high numbers from disadvantaged backgrounds
- The intervention will not be readily accessible for women who do not accept screening appointments
- Not all women interested in lifestyle change will be able to participate due to capacity issues with lifestyle coaches

### Competing interest statement

All authors have completed the ICMJE uniform disclosure form at [www.icmje.org/coi\\_disclosure.pdf](http://www.icmje.org/coi_disclosure.pdf) and declare: no support from any organisation for the submitted work other than the Scottish Government who funded the award, no financial relationships with any organisations that might have an interest in the submitted work in the previous three years, and no other relationships or activities that could appear to have influenced the submitted work.

### Clinical trials registration

Ethical approval for this study was provided by East of Scotland Research Ethics Service (REC reference: (17/ES/0073). Our initial submission to ethics in January 2017 was withdrawn as we were advised to submit the formative work to the University of Dundee ethics committee (approved 05/04/17, Ref 020/17) and the remainder to NHS ethics once the formative work was completed. This process took several months (to complete the

1 formative work) and delayed both the NHS ethics submission (and approval provided on  
2 22/06/17) and the recruitment start date. This resulted in a delay in registering the study  
3 with ISCRTN until the final protocol was completed and the submission details updated. This  
4 was assigned prospectively on 21/07/2017. Recruitment for the study commenced on  
5 01/08/17 (after the registration date) with first participant randomised on 05/09/2017 due  
6 to the aforementioned project delay.  
7  
8  
9

## 11 **Funding**

14 This work was supported by The Scottish Government, grant number BC/Screening/17/01.

## 16 **Author Contributions**

19 ASA is the principal investigator and has overall responsibility for all aspects of the ActWELL  
20 study. She initiated the study, designed the intervention, led on development of the  
21 protocol and drafting the manuscript. AC, CMcA and NM were involved in intervention design  
22 and training, assessment methodology, finalising the protocol, reading, editing and  
23 approving the manuscript. SG is the trial manager and responsible for co-ordinating all  
24 aspects of the ActWELL study, drafting the protocol and reading, editing and approving the  
25 manuscript. EJM has responsibility for clinical issues, inclusion and exclusion criteria, trial  
26 design, finalising the protocol and reading, editing and approving the manuscript. ARN is  
27 responsible for health economics analysis, assessment methodology, finalising protocol and  
28 reading, editing and approving the manuscript. REO'C has responsibility for all psychological  
29 aspects of intervention design, assessment methodology, fidelity measures, finalising the  
30 protocol and reading, editing and approving the manuscript. PR is responsible for statistical  
31 design, analysis plan drafting protocol and reading, editing and approving the manuscript.  
32 NS is responsible for design of blood collection procedures, overseeing analysis of bloods,  
33 finalising protocol design and reading, editing and approving the manuscript. MS is  
34 responsible for formative qualitative analysis, intervention design, acceptability measures,  
35 finalising protocol and reading, editing and approving the manuscript. ST is responsible for  
36 trial design, recruitment strategies, day to day management decisions (with ASA and SG),  
37 finalising protocol reading, editing and approving the manuscript.  
38  
39  
40  
41  
42  
43  
44  
45  
46  
47

48 **Provenance and Peer Review** Externally peer reviewed.  
49  
50  
51  
52  
53  
54  
55  
56  
57  
58  
59  
60

## Acknowledgements

The authors would like to acknowledge the assistance of Mary Allison, Amy Hickman, and Eluned Hughes from Breast Cancer Now and Dr Stephen Caswell in manuscript preparation and co-ordination of volunteer training.

Staff at the NHS Scottish Breast Screening Programme who have assisted in programme design.

Grateful thanks for regular communications and valuable time are due to our Patient advisor (Elspeth Banks) and Public Advisory Group members (Pamela Deponio, Maggie Taylor and Mary Wotherspoon).

The Health Services Research Unit and The Health Economics Research Unit, University of Aberdeen receives core funding from the Chief Scientist Office of the Scottish Government Health Directorates.

## Data Sharing Statement

None

## INTRODUCTION

Breast cancer accounted for 14.5% of all cancer diagnoses in Scotland in 2014 and accounts for 28% of female cancer cases<sup>1</sup>. Incidence is increasing and current predictions from ISD (Scottish Government) suggest a rise by 27.5% between and 2008-2012 and 2023-2027<sup>2</sup>.

Whilst many factors are implicated in aetiology (genetics, reproductive history, hormone use), current estimates suggest that 38% of breast cancers in post-menopausal women in the UK are related to physical inactivity, alcohol consumption and body fatness<sup>3</sup>. There is consistent evidence that being overweight or obese throughout adulthood increases the risk of post-menopausal breast cancer<sup>4</sup>.

In addition, gaining weight in adult life is a strong predictor of breast cancer (especially in women who have not taken hormone replacement therapy)<sup>5</sup>. Ahn et al reported that at any BMI, increased weight in adult life is associated with greater risk of breast cancer and a gain of 2-10kg after the age of 50 (e.g. post-menopausal) is associated with a 30% increase in breast cancer risk<sup>6</sup>. Findings from the EPIC study have also demonstrated that high weight gain in middle adulthood increases the risk of breast cancer<sup>7</sup>. In the Women's Health Initiative, Neuhouser et al.<sup>8</sup> reported that post-menopausal women with a BMI < 25kg/m<sup>2</sup> at baseline who gained >5kg of body weight during the follow up period (median 13 years) had a 36% increase risk of developing breast cancer.

Lifestyles and weight management are also related to risk reduction. Women meeting at least 5 of the World Cancer Research Fund prevention guidelines for lifestyle show a 60% lower risk for breast cancer compared to women meeting none of the guidelines<sup>9</sup> and a recent systematic review reported that high versus low adherence to cancer prevention guidelines was associated with consistent reductions in breast cancer incidence<sup>10</sup>. Data from audits of bariatric surgery show that large weight losses are associated with large decreases in female cancers<sup>11</sup>. One recent North American study of 22,198 people 3.5 years after bariatric surgery reported reductions in post-menopausal breast cancer of 42%<sup>12</sup>. In addition, moderating weight gain in adult life through caloric adjustment and being physically active is likely to be of benefit for reduction in other cancers related to these behaviours<sup>13</sup> as well as other non-communicable diseases<sup>14,15</sup>.

Most (73%) Scottish women aged 50 to 70 years accept invitations to attend the routine NHS Scottish Breast Screening Programme (NHSSBSP) and over 175,000 women attend each year<sup>16</sup>. In addition, women aged over 70 are able to attend through self-referral. The

1 NHSSBSP therefore provides a unique opportunity to endorse weight management  
2 intervention. However, a greater understanding of the benefits, costs, acceptability and  
3 impacts are needed to examine whether a NHSSBSP-initiated intervention can be effective  
4 and cost efficient.  
5  
6

7 In 2007, Fisher et al.<sup>17</sup> reported that most women attending breast screening clinics are  
8 interested in receiving lifestyle advice, and an updated paper reporting the view of 1,803  
9 women shows overwhelming support for receiving interventions through this setting<sup>18</sup>.  
10 However, a review published in 2013<sup>19</sup> reported that whilst the importance of weight  
11 management in breast and colorectal cancer prevention is widely recognised, there is little  
12 evidence that lifestyle is discussed within cancer screening settings. It was also noted that  
13 the lack of advocacy about health behaviour change may endorse poor health behaviours by  
14 creating a 'health certificate effect.' This issue may be particularly relevant for body weight,  
15 where a lack of guidance to visibly obese patients may imply a lack of medical concern. The  
16 cancer research "gap analysis" reviews by Breast Cancer Campaign<sup>20,21</sup> highlighted the role  
17 of breast screening programmes as an opportunity for promoting cancer prevention  
18 activities, but noted the challenge of finding ways to support and facilitate women to  
19 achieve healthy ways of life.  
20  
21  
22  
23  
24  
25  
26

27 In Scotland, the breast cancer community (government, charities and health professionals)  
28 is currently exploring innovative and sustainable preventative opportunities including  
29 supporting weight management programmes. The Scottish Health Survey<sup>22</sup> has reported  
30 that 72% of women aged 55 to 74 years have a BMI >25kg/m<sup>2</sup> (76% in women living in  
31 areas of higher deprivation). Furthermore, 42% of women **do not** achieve the  
32 recommendation of 150 minutes of physical activity per week, and this proportion increases  
33 with age. The National Institute of Clinical Excellence (NICE)<sup>23</sup> recommend that lifestyle  
34 weight management programmes are multi component and aim to reduce a person's energy  
35 intake and help them to be more physically active by changing behaviour. However, access  
36 to such NHS programmes is limited and commercial programmes have cost implications for  
37 low income adults.  
38  
39  
40  
41  
42  
43  
44

45 It is recognised that partnerships between the NHS and the voluntary sector offer significant  
46 value for money and the potential for greater "reach" of interventions into community  
47 settings. The recent Lancet series on obesity highlighted that, despite government efforts to  
48 reduce the prevalence of obesity, these approaches are insufficient to help adults who are  
49 currently overweight or obese<sup>24</sup>. Innovative strategies beyond those currently delivered by  
50 health professionals are needed to increase capacity of delivery of weight management  
51 programmes.  
52  
53  
54  
55

1 Community lifestyle interventions initiated in the breast cancer screening setting are a  
2 largely unexplored area although repeated triennial appointments offer unique opportunities  
3 for initiation and re-enforcement<sup>25</sup>. This setting also provides an opportunity to engage with  
4 women from areas of higher deprivation (63%, 71% and 76% of women from Scottish  
5 Index of Multiple Deprivation (SIMD 1, 2, 3 quintiles respectively attend for screening)<sup>26</sup>.  
6  
7

8  
9 The ActWELL feasibility study demonstrated that recruitment, retention, indicative results  
10 and participant acceptability merited a full randomised control trial to test the long term  
11 impact of the intervention. In addition, 31% of participants recruited were from the lowest  
12 two quintiles of deprivation<sup>27</sup> indicating significant potential to reach women from higher  
13 rates of social deprivation who also tend to be more obese.  
14  
15

16  
17 Feedback from screening centre users showed whilst many were aware of lifestyle issues in  
18 relation to diabetes and cardiovascular disease, information about lifestyle and breast  
19 cancer was new and considered “motivating” if the focus was on positive ways to help  
20 support behaviour change<sup>28</sup>.  
21  
22

23  
24 The current study is designed to assess the effectiveness of a community based,  
25 personalised, minimal contact weight management programme in women with a  
26 BMI >25kg/m<sup>2</sup> attending routine breast cancer screening clinics. The intervention  
27 programme is a collaboration between the charity Breast Cancer Now (BCN), NHSSBSP,  
28 local authority leisure centres and academic partners. This work is the first time that a  
29 cancer charity has offered volunteer capacity for cancer prevention action on weight  
30 management and offers significant potential to address gaps in public health efforts. The  
31 design is pragmatic to increase the relevance of the findings to policymakers, women  
32 eligible for breast screening and health professionals (see Appendix 1).  
33  
34  
35  
36  
37

38 The study aims to assess the effectiveness and cost-effectiveness of a theory based,  
39 community delivered, minimal contact, weight management (diet, physical activity and  
40 behaviour change techniques) programme (ActWELL) in women with a BMI >25 kg/m<sup>2</sup>  
41 attending routine breast cancer screening clinics.  
42  
43  
44

## 45 **METHODS AND ANALYSIS**

### 46 **Trial design and setting**

47  
48  
49  
50 The study will be a four centre, 1:1 parallel-arm, randomised controlled trial of a 12 month,  
51 weight management intervention. The participants will be randomly allocated into two  
52 groups (1) standard care with health information leaflet or (2) experimental group who  
53 receive the ActWELL intervention. Potential participants will be introduced to the study whilst  
54  
55



1 attending routine NHS breast cancer screening appointment (static and mobile screening  
2 units) in Scotland. The study participant flow is presented in Figure 1.  
3

4 All trial measurements will be undertaken by trained research nurses at baseline, 12 weeks  
5 and 12 months within the NHS Clinical Research Centres (CRC) in the areas served by the  
6 breast screening sites.  
7  
8

9 The intervention is delivered and supported by Breast Cancer Now volunteers who have  
10 undergone two days bespoke training on the intervention. The face to face intervention  
11 communications are delivered within local authority run leisure centres (or other appropriate  
12 community locations).  
13  
14  
15

## 16 **Participants**

17  
18 All attendees at routine NHS breast screening appointments will be advised about the study  
19 by NHSSBSP staff in writing and verbally. On checking in at the clinic women will be given a  
20 brief study information leaflet by the receptionist. During their visit the mammographer will  
21 briefly (approx. 30 seconds) mention the study verbally. If they are agreeable to a  
22 researcher making contact with them, women will be invited to leave their details on a  
23 contact card (telephone/email/postcode) which they can place in a study box in the  
24 reception area. A pop up banner, or poster, will also be displayed in the breast screening  
25 clinic or mobile van to further highlight the study and how to contact the research team. All  
26 NHS screening staff will be provided with training which introduces the aims of the study,  
27 why the trial is designed the way it is, the importance of their role, how to minimise the  
28 time taken to introduce the study and how to answer common questions. Within each site, a  
29 team "champion" will be identified from within the NHSSBSP staff to encourage colleagues  
30 and co-ordinate recruitment efforts.  
31  
32  
33  
34  
35  
36  
37  
38

39 Research staff will contact women leaving contact cards within two weeks and assess study  
40 eligibility.  
41  
42

## 43 **Inclusion Criteria**

- 44
- 45 • Attending, or invited to attend, routine breast screening clinics (not recall clinics)
- 46
- 47 • Measured BMI >25 kg/m<sup>2</sup>
- 48
- 49 • Age 50 to 70 years
- 50
- 51
- 52
- 53
- 54
- 55
- 56
- 57
- 58
- 59
- 60

## Exclusion Criteria

- Currently undergoing treatment for any malignant condition (excluding basal or squamous cell skin cancers)
- Reported contra-indication to physical activity (e.g. recent surgery)
- Reported contra-indication to weight loss (e.g. currently following a recovery programme for weight gain)
- On a specialised diet e.g. gluten free
- Diagnosis of Types 1 diabetes
- Current use of insulin
- No telephone contact
- Unable to consent

Participants who are considered eligible will be invited to attend their local research centre to provide informed consent before commencing baseline measures.

Participants found to be ineligible to take part, either on telephone screening or at a baseline visit, will be thanked for their time and will be offered, by post or email, lifestyle and cancer prevention information and/or information on local leisure facilities applicable to them. Where possible, this will also apply to women who have expressed an interest (e.g. left a completed card) but who have not been selected to take part in the trial due to the volume of people that can be seen by the research team. In the event of very large numbers of cards being returned it may not be possible to contact all women and this is made clear in the brief information leaflet.

## Randomisation

Participants will be randomised centrally at a 1:1 ratio into the intervention or usual care groups using the web-based TRuST system designed by Tayside Clinical Trials Unit (TCTU). Randomisation will be stratified by site and minimised by socio-economic status based on Social index of Multiple Deprivation (SIMD)<sup>29</sup> SIMD (two groups: SIMD 1 or 2; SIMD $\geq$ 3).

In addition, a sub group comprising 146 women (73 from each group) will be randomly allocated by the TRuST system to receive an activPAL™ monitor (accelerometer) as an

1 objective measure of physical activity. This number has been identified to meet statistical  
2 power (see below).  
3

4 **Usual care group:** Following the end of their baseline measures, participants will receive a  
5 cancer prevention leaflet<sup>30</sup>. The study administrator will then notify participants of their  
6 randomisation by letter. On completion of their 12 month follow up visit women will be  
7 offered a single personalised coaching session and the ActWELL intervention booklet.  
8  
9

10 **Intervention group:** Following the end of their baseline measures participants will receive  
11 a cancer prevention leaflet<sup>30</sup>. The study administrator will then notify participants of their  
12 randomisation by letter. The Breast Cancer Now volunteer coordinator will allocate a Breast  
13 Cancer Now Lifestyle Coach (LC) to the participant. The LC will contact the participant to  
14 arrange an appointment for their first face to face visit.  
15  
16  
17  
18

### 19 **Blinding**

20 The study team will be blind to the participants' group allocation until completion of the  
21 primary outcome analysis. Exceptions are the trial manager, study administrator, lifestyle  
22 coaches and participants who cannot be blinded owing to the nature of the intervention.  
23  
24  
25  
26

### 27 **Intervention**

28 Initial work focused on optimising the intervention to scale up the previous prototype for a  
29 12 month follow up period. This was developed from the original feasibility study protocol  
30 and using feedback obtained from study participants and lifestyle coaches. Later feedback  
31 came from our recent research study offering a weight management lifestyle intervention to  
32 women attending family history clinics<sup>31</sup> and our newly formed ActWELL public advisory  
33 team. The proposed study builds on existing behaviour change models<sup>32</sup> particularly the  
34 COM-B model<sup>33</sup>. Thus, the intervention aims to incorporate **capability** for effective lifestyle  
35 change combined with **opportunities** for greater physical activity through an emphasis on  
36 walking initiatives and other community facilities (using taxonomy-derived effective  
37 behaviour change techniques<sup>34</sup>) and increased **motivation** for weight management  
38 (through awareness raising within the teachable moment setting).  
39  
40  
41  
42  
43  
44  
45  
46

47 In addition, four formative qualitative focus groups with individuals in the target population  
48 were held to obtain feedback on the prospective 12 month intervention including  
49 refinements on alcohol messaging.  
50  
51

52 **Intervention content:** The initial part of the intervention (months 1 to 3) will focus on  
53 helping achieve 7% of body weight loss (consistent with the lifestyle intervention in the  
54  
55

1 highly effective Diabetes Prevention Programme<sup>35</sup>) and the remaining months will also  
2 combine techniques for weight loss maintenance (WLM) by addressing both caloric intake  
3 and energy expenditure.  
4

5  
6 Behavioural change techniques (BCT) include goal setting, implementation intentions, self-  
7 monitoring of body weight and feedback. The latter may be particularly important for WLM.  
8 This part of the intervention will take a habit-formation based approach using the Ten Top  
9 Tips shown to be successful for WLM over a 2 year period<sup>36</sup>. Social support will be  
10 encouraged throughout the 12 months through regular coach contact and encouragement to  
11 share the intervention with a friend/buddy. The initial introduction to the leisure centre will  
12 also provide an introduction to locally available exercise facilities and classes.  
13  
14  
15

16  
17 Tailored personalised advice is a key component of all aspects of the intervention.  
18 Motivational interviewing about weight loss will be undertaken to identify participant  
19 ambivalence and perceived personal advantages to weight management.  
20  
21

22 The **caloric prescription** will be based on 600kcal below that required for weight  
23 maintenance (calculated using the equations for basal metabolic rate according to gender,  
24 age and body weight).  
25  
26

27 **Food and drink choices** will be based on information obtained from current eating habits  
28 obtained through 24 hour recalls to guide personalised advice on food frequency, portion  
29 sizes and foods to limit. Participant agreed goals (and implementation intentions) will be  
30 used for one specific food or drinking habit and this will be self-monitored with personalised  
31 feedback provided.  
32  
33  
34

35  
36 **Physical activity dose** All participants will undertake the Scottish Physical activity  
37 screening questionnaire (Scot-PASQ)<sup>37</sup> by the coach as an indicator of current activity levels  
38 to help guide the communications about walking plans and signpost other activities  
39 (including those offered in the local leisure centres). Participant agreed pedometer goals  
40 (and implementation intentions) will be used for habitual walking and this will be self-  
41 monitored with personalised feedback provided. Participants will be supported to gradually  
42 increase physical activity towards accumulating at least 150 minutes of moderate intensity  
43 physical activity per week and then, where appropriate, towards 300 minutes per week  
44 (Based on Scottish Intercollegiate Guidelines Network (SIGN)<sup>38</sup> guidance on weight  
45 management.  
46  
47  
48  
49  
50

51 A detailed description of each intervention visit and telephone calls are provided in Appendix  
52 2.  
53  
54

1 **Intervention delivery** There will be two face to face intervention meetings (one of 60  
2 minutes and one of 45 minutes). Over a 12 month period there will be up to nine further  
3 contacts by telephone. The intervention programme will be delivered by Breast Cancer Now  
4 volunteers who have received the training programme to become lifestyle coaches.  
5  
6

7 **Intervention fidelity** We will undertake independent analysis of fidelity to the  
8 intervention. Fidelity of programme delivery and content will be assessed by audio-recording  
9 and transcription from a purposeful sample of approximately 10% of ActWELL lifestyle  
10 coaches including face to face interactions and telephone contacts at each site. A researcher  
11 independent from the intervention delivery will analyse the transcripts and evaluate the  
12 proportion of points covered in each session relative to those described in the intervention  
13 protocol. Time for implementation procedures will be recorded by the lifestyle coaches.  
14  
15  
16  
17

### 18 **Outcome measures**

19  
20  
21 A full list of measurable outcomes and sources (<sup>39,40,41,42</sup>) is presented in Table 1.  
22  
23  
24  
25  
26  
27  
28  
29  
30  
31  
32  
33  
34  
35  
36  
37  
38  
39  
40  
41  
42  
43  
44  
45  
46  
47  
48  
49  
50  
51  
52  
53  
54  
55  
56  
57  
58  
59  
60

**Table 1 Outcome Measures**

| 1 <b>Primary Outcomes</b>   |                            | Baseline                                                                                                                                           | 12 week | 12 month |
|-----------------------------|----------------------------|----------------------------------------------------------------------------------------------------------------------------------------------------|---------|----------|
| 2                           |                            |                                                                                                                                                    |         |          |
| 3                           | Body weight                | Measured using digital body weight scales (kg)                                                                                                     | X       | X        |
| 4                           |                            |                                                                                                                                                    |         |          |
| 5                           | Physical Activity          | 7 days accelerometry with ActivPAL (steps)                                                                                                         | X       | X        |
| 6                           |                            |                                                                                                                                                    |         |          |
| 7 <b>Secondary outcomes</b> |                            |                                                                                                                                                    |         |          |
| 8                           |                            |                                                                                                                                                    |         |          |
| 9                           | Modes of physical activity | Scottish Physical Activity Questionnaire SPAQ <sup>34</sup>                                                                                        | X       | X        |
| 10                          | Sedentary behaviour        | 7 days accelerometry with activPAL™ (subsample only)                                                                                               | X       | X        |
| 11                          |                            |                                                                                                                                                    |         |          |
| 12                          | Anthropometric changes     | BMI (height and weight) Waist circumference (cm)                                                                                                   | X       | X        |
| 13                          |                            |                                                                                                                                                    |         |          |
| 14                          | Eating habits              | Questionnaire based on Scottish Health Survey <sup>22</sup>                                                                                        | X       | X        |
| 15                          |                            |                                                                                                                                                    |         |          |
| 16                          |                            | • Fruit and vegetable intake <sup>39</sup>                                                                                                         |         | X        |
| 17                          |                            |                                                                                                                                                    |         |          |
| 18                          |                            |                                                                                                                                                    |         |          |
| 19                          | Alcohol intake             | Audit C questionnaire <sup>40</sup>                                                                                                                | X       | X        |
| 20                          |                            |                                                                                                                                                    |         |          |
| 21                          | Psycho-social variables    | Modified brief illness questionnaire <sup>41</sup>                                                                                                 | X       | X        |
| 22                          |                            | Knowledge and beliefs about lifestyle and breast cancer risk (developed in house)                                                                  | X       | X        |
| 23                          |                            | Psychosocial health measures resources (perceived motivation, awareness, ability, action, monitoring, and social support around weight management) |         | X        |
| 24                          |                            | Perceived body weight (developed in-house)                                                                                                         | x       | x        |
| 25                          |                            |                                                                                                                                                    | x       | x        |
| 26                          |                            |                                                                                                                                                    |         |          |
| 27                          |                            |                                                                                                                                                    |         |          |
| 28                          |                            |                                                                                                                                                    |         |          |
| 29                          | Economic outcomes          | EQ5D-5L questionnaire <sup>42</sup>                                                                                                                | X       | X        |
| 30                          |                            |                                                                                                                                                    |         |          |
| 31                          |                            | Economic health resource usage (Developed by HERU, University of Aberdeen)                                                                         | X       | X        |
| 32                          |                            |                                                                                                                                                    |         |          |
| 33                          | Cardiovascular risk        | Blood sampling for lipids                                                                                                                          | X       | X        |
| 34                          |                            |                                                                                                                                                    |         |          |
| 35                          |                            | Blood pressure                                                                                                                                     | X       | X        |
| 36                          |                            |                                                                                                                                                    |         |          |
| 37                          | Diabetes risk              | HbA1c                                                                                                                                              | x       | x        |
| 38                          |                            |                                                                                                                                                    |         |          |

1 Data collection will occur at baseline, 12 weeks and 12 months. Data will be collected by the  
2 blinded research nurses from the clinical research centres in each location (trained on the  
3 study protocol) at baseline and 12 months, and over the telephone at 3 months, and  
4 entered directly onto study Case Report Forms and questionnaires. Detailed Standard  
5 Operating Procedures (SOPs) will be provided on each aspect of the protocol to ensure  
6 consistent methodology is used by all staff.  
7  
8  
9

10 At baseline, along with the collection of demographic and background (e.g. menopausal and  
11 smoking status) data by questionnaire, any contraindications to physical activity will also  
12 assessed using the PAR-Q physical activity readiness questionnaire<sup>43,44</sup>. Where required, and  
13 in all women aged 70, participants will be asked to seek advice from their GP before  
14 becoming more physically active. Height will also be measured to the nearest 1mm using a  
15 calibrated stadiometer, with shoes removed, in order to determine BMI and confirm  
16 eligibility.  
17  
18  
19  
20

21 Co-primary outcomes will be change in body weight and change in physical activity by 12  
22 months. Both will be measured as the mean difference between groups at 12 months  
23 adjusted for baseline, site and Scottish Index of Multiple Deprivation (SIMD)<sup>29</sup>. Weight will  
24 be measured to the closest 100g, in light indoor clothing and without shoes, heavy jewellery  
25 or pocket contents, using regularly calibrated electronic scales. Physical activity will be  
26 objectively measured using thigh worn activPAL™ (PAL Technologies Ltd., Glasgow, UK)  
27 accelerometers. These monitors measure free-living sedentary, upright and ambulatory  
28 activity and provide data on step count and time spent sedentary. The devices will be fitted  
29 by the research nurses to ensure correct placement, and the participants will be asked to  
30 wear them at all times (excluding when swimming or bathing) for 8 nights to ensure a full 7  
31 days of recording. A demonstration and instructions will be provided in case removal is  
32 required.  
33  
34  
35  
36  
37  
38  
39

40 Secondary outcomes will be changes in waist circumference, modes (types) of physical  
41 activity, sedentary behaviour, eating habits, alcohol intake, psycho-social variables,  
42 economic outcomes, HbA1C, non-fasting lipids and non-fasting insulin, blood pressure, and  
43 cardiovascular disease risk (incorporating blood pressure and lipid measures).  
44  
45  
46

47 Waist circumference will be measured midway between the iliac crest and lower costal  
48 margin using a Seca 201 measuring tape. Modes of physical activity will be determined from  
49 a 7 day recall questionnaire<sup>45</sup>, and sedentary behaviour from analysis of the activPAL™ data.  
50 Questionnaire based tools will be used to determine eating habits, alcohol intake, psycho-  
51 social variables (e.g. illness perception, knowledge and beliefs about lifestyle and breast  
52  
53  
54  
55

1 cancer risk, and personal health resources e.g. motivation, awareness and social support  
2 around weight management, self-monitoring, and perceived ability to manage weight) (see  
3 Table 1). In order to determine the economic outcomes of the trial, data on health-related  
4 quality of life was collected using the EQ-5D-5L questionnaire<sup>42</sup>, along with questions on use  
5 of NHS health care resources (number of primary care contacts, inpatient, outpatient and  
6 day cases).  
7  
8  
9

10 Blood pressure will be measured using a Microlife 3BTO digital blood pressure monitor, or  
11 other approved BP monitor in the local clinical research facility, with the participant seated  
12 and relaxed. One non-fasted blood sample will be taken per person at both the baseline and  
13 12 month follow up visits in order to measure HbA1C, non-fasting lipids and non-fasting  
14 insulin. Samples will be processed and stored at local clinical research centres and shipped  
15 in batches to Glasgow University laboratories for analysis. All samples will be analysed in a  
16 blinded fashion anonymised fashion at the same time to minimise analytical variation, with  
17 no individual results being made available to participants.  
18  
19  
20  
21  
22

23 Delivery Outcomes: In addition to the intervention delivery time recording and fidelity  
24 assessments described earlier, delivery will be also be evaluated in terms of engagement  
25 (recruitment and retention), using data collected by coaches, exit questionnaires and  
26 through interviews with coaches and participants to record their experiences.  
27  
28  
29

### 30 **Process Evaluation**

31  
32 These measures are aimed at identifying feasibility and acceptability issues pertinent to  
33 decisions about roll-out:  
34  
35

#### 36 a) Breast Screening centres

- 37  
38 • Observations from the waiting room by the research team will be conducted on 2  
39 occasions per site before and after recruitment commences. Data on clinic start and  
40 end times will be noted and mammography staff asked to provide comments relating  
41 to clinic flow.  
42  
43
- 44 • In order to estimate the reach of endorsements by mammographers, we will request  
45 that clinic numbers are obtained (preferably as appointments attended), and track  
46 total ActWELL cards provided to clinics and total cards returned.  
47  
48
- 49 • A sample of mammographers will be invited to participate in individual semi-  
50 structured qualitative interviews 1 interview per site, total n=4) to explore  
51 perceptions and experiences of recruitment, including perceived ease of study  
52 introduction, time burden, positive and negative experiences that have arisen,  
53  
54  
55



1 handling of questions, support from clinic staff and training from research team.  
2 Interviews will be conducted shortly after the end of the study recruitment period  
3 (e.g. September 2018) to enable mammographers to reflect on experiences over the  
4 whole period while recall is still relatively fresh.  
5  
6  
7  
8

9  
10 b) Breast Cancer Now are collecting information on

- 11 • advertising for coaches (where, when and costs),
- 12 • responses to advertising (applications and telephone/email queries)
- 13 • Time and volunteer/coach experience of joint training programme with ActWELL team
- 14 • Volunteer Coach reported problems, queries and reasons for drop out
- 15 • Co-ordinators' experience of managing coaches

16 This data will be used to inform the economic analysis.

17  
18  
19  
20  
21  
22 c) Breast Cancer Now lifestyle coaches will be asked to collect data on participant contacts

- 23 • Number of face to face visits attended
- 24 • Number of phone calls achieved
- 25 • Time taken for each contact
- 26 • Perceived engagement at each contact
- 27 • A sample of coaches from each site (2 per site, total n=8) will be invited to  
28 participate in individual semi-structured qualitative interviews to explore perceptions  
29 and experiences of delivery, including recruitment, training, implementation,  
30 participant contact procedures, perception of intervention acceptability, time  
31 commitments and exit strategies. The interviews will also explore coaches'  
32 perceptions of facilitators and barriers to participant engagement in the programmes.  
33 Interviews will be conducted shortly after the end of the delivery period.

34  
35  
36  
37  
38  
39  
40  
41  
42  
43  
44 d) Leisure centres

- 45 • A sample of 4 Leisure Centre co-ordinators will be invited to participate in individual  
46 semi-structured qualitative interviews to explore their perceptions and experiences of  
47 hosting the coach sessions, including burden, space, time, challenges, and any  
48 potential benefits or negative consequences for the Leisure Centre. Interviews will be  
49 conducted shortly after the end of the delivery period (e.g. May 2019) to enable co-  
50  
51  
52  
53  
54

ordinators to reflect on experiences over the whole period while recall is still relatively fresh.

#### e) Participants

Semi-structured qualitative interviews will be conducted with 20 intervention participants (5 per study site) after expression of an interest to participate during the final 12 month visit. Interviews will be conducted via telephone. Interviews will be conducted at the end of each participant's period of engagement in the study to allow participants to reflect over the entire period of their engagement while recall is still relatively fresh. We decided not to interview participants during their engagement in the study so as to avoid introducing any intervention effects which might have arisen from participants being sensitised to the questions and issues under discussion.

A semi-structured interview schedule designed to cover key topics whilst also eliciting additional participant perspectives will be used. Interviews will cover participants' views and experiences of engaging with the study, including motives for participation and understanding of the study purpose; possible impact of the study on attendance for screening; perceptions and opinions of the programme content, duration, accessibility intensity, recruitment and exit strategy; views of the coaching process and experience of setting goals; experiences of attempting to make changes over the 12 month intervention period and the facilitators and barriers to making changes. Possible facilitators and barriers to be explored include personal beliefs, motivation, family members, social and coach support. With the consent of participants, all interviews will be audio-recorded.

## Statistical considerations

### Sample size

Body weight: Using the data from the overweight women ( $BMI > 25 \text{ kg/m}^2$ ) in the ActWELL feasibility study (mean body weight  $80.9 \pm 17.9 \text{ kg}$ ) a total of 414 women (207 per group) would be needed to detect a 7% weight change at 90% power. Allowing for 25% drop out (based on our findings from the feasibility study) this would mean randomising 552 women. Based on feasibility data we estimate that we would need 849 women to express an interest in the study which allows for 25% who would be ineligible on grounds of  $BMI < 25 \text{ kg/m}^2$  and 10% who initially express interest then change their minds. The NHSSBSP screens thousands of women each year so we do not anticipate any problems with 849 women expressing an interest in the study.

**Physical activity:** Given that the activity data from the ActWELL feasibility study was based on self-report, an objective measurement of steps using pedometers in the predominantly (80%) female participants of the 'Walking for Wellbeing in the West' study<sup>45</sup> was used to inform the sample size calculation. At baseline, a mean of 6,802  $\pm$  3,212 steps were recorded in the intervention group. In order to detect a difference of 2,000 steps between groups at follow-up, at 90% power, 102 women (51 per group) would be required to complete this aspect of the study using ActivPAL accelerometers (shown to be feasible in studies of older adults and enabling accurate estimates of activity and sedentary behaviour<sup>46,47</sup>). Allowing for 20% drop out plus any equipment malfunction/postal losses we would recruit a further 30% bringing the total enrolment to 146 of the 552 participants for this aspect of the study. In summary a sub-sample of 146 the 552 women recruited above will be asked to wear the accelerometers.

### **Quantitative analysis**

Statistical analysis of outcomes will be undertaken by statisticians at Tayside Clinical Trials Unit (TCTU). In the main analysis we will use an intention to treat analysis with all available data. We will undertake multiple linear regression analyses with mixed effects models adjusted for the corresponding baseline values with group allocation and site as fixed effects. For the primary outcomes we will also undertake a sensitivity analysis using both repeated measures and multiple imputations for missing values.

We do not anticipate that clustering effects will be a substantial issue in ActWELL, which is why we have designed the trial as individually randomised. We anticipate 24 or more Breast Cancer Now lifestyle coaches delivering the intervention, making each cluster small at around 10 participants. It is possible that even more lifestyle coaches will be involved depending on the capacity of BCN. We also anticipate that participants will be evenly distributed across the four breast screening centres rather than having a dominant centre. We will, however, look for evidence of clustering effects as a secondary analysis and present and interpret our results in light of this analysis.

### **Missing data**

The extent of missing data will be examined and, if necessary, methods such as multiple imputation will be implemented to provide robust results, assuming data are missing at random (MAR). We will examine the extent of missing data by considering the differences between those with complete data and those with missing and if they are similar we will assume data is missing completely at random (MCAR). If they do differ we will assume MAR

1 and use multiple imputations and compare with the primary analysis. We will try to obtain  
2 reasons for missing data during the trial and if the probability of missing data is related to  
3 the outcome then data may be not missing at random (NMAR). If this looks likely, then  
4 mechanisms of missingness and outcomes will be modelled together.  
5  
6  
7  
8  
9

## 10 **Qualitative analysis**

11 All interview recordings will be transcribed in full for analysis. Transcripts will be coded for  
12 thematic analysis, with the coding themes to be agreed among the researchers based on the  
13 core questions and topic areas, including any new and emerging themes. The reliability of  
14 the themes will then be reassessed by a process of familiarisation with the transcript texts.  
15 Discussions between researchers will enable identification of emerging themes and  
16 resolution of interpretive difference.  
17  
18  
19  
20  
21

## 22 **Cost effectiveness analysis**

23 Intervention Costs data will be collected by health economics team including  
24

- 25 • Breast Cancer Now costs (co-ordinator salary, training, transport)
- 26 • Intervention consumable costs (training packs and participant materials)
- 27 • Intervention delivery staff costs (coach training, mentoring and overseeing costs)

28 The cost-effectiveness analysis of the ActWELL intervention compared with usual care will be based on resource use and  
29 outcomes (EQ-5D-5L) data<sup>42</sup> (collected from participant's questionnaires and telephone  
30 interviews). This will take the format of a within-trial cost-effectiveness analysis and use a  
31 cost-utility analysis framework. The effects of the ActWELL intervention will be estimated as  
32 gain in quality-adjusted life years (QALYs) at 12 months using EQ-5D-5L data collected at  
33 baseline, 3 and 12 months. Estimates of cost-effectiveness will be expressed as the  
34 incremental cost per QALY gained (over 12 months).  
35  
36  
37  
38  
39  
40  
41  
42  
43

## 44 **Patient and Public involvement**

45 The development of research questions and outcome measures arose from pilot work<sup>27</sup>  
46 which included feedback from participants. A public advisory group was established  
47 comprising 3 patient representatives from breast screening attendees recruited by Breast  
48 Cancer Now, plus a patient advisor on the investigation team (who will chair the public  
49 advisory group). The public advisory group will be involved in every aspect of the trial. This  
50 is particularly important with respect to trial design and feedback, issues including  
51  
52  
53  
54  
55  
56  
57  
58  
59  
60

1 inequalities, access to intervention, recruitment, perspectives on written, verbal and e-  
2 communications, burden of study procedures (including questionnaires), interpretation of  
3 qualitative data, conduct of the study and dissemination events. In addition, information  
4 attained from formative research with screening participants will be used to assist in the  
5 design of the intervention content and delivery. After the study is complete participants will  
6 be interviewed to gain insight to the study burden and procedures. A summary of results will  
7 be available for all participants.  
8  
9  
10

### 11 **Ethics and dissemination**

12  
13  
14  
15  
16 The ActWELL trial follows all procedures set out by the Tayside clinical trials unit including  
17 reporting adverse and serious adverse events. All reports will be reviewed by the senior  
18 clinician and appropriate actions taken. The intervention is considered low risk and all  
19 coaches are trained on supporting modest changes in physical activity to decrease risks  
20 associated with vigorous or intense activity.  
21  
22

23  
24 The study dissemination plan includes reports to the funder to assist in decision making  
25 about potential roll out. Reports of the findings will also be shared with Breast Cancer Now,  
26 Scottish Screening Committee, Scottish Cancer Task Force, participating screening centres,  
27 participating leisure centres and our public advisory group. A summary of findings will be  
28 available for all participants.  
29  
30

31  
32 Academic dissemination through papers in peer reviewed journals and conference  
33 presentations will be focussed on reporting the main impact of the intervention on primary  
34 and secondary outcomes, health economic evaluation and qualitative findings that will assist  
35 decisions about roll out. Findings related to recruitment challenges, the experience of  
36 volunteer coaches and psycho-social findings which may have impacted on process and  
37 outcomes will also reported.  
38  
39  
40

41  
42 Public dissemination will utilise social media channels including those of the Scottish Cancer  
43 Prevention Network, academic institutions involved and public events such as 'café science'.  
44  
45

## 46 **DISCUSSION**

47  
48  
49 This paper describes the protocol for an RCT to determine the effectiveness and cost  
50 effectiveness of a weight management intervention targeted at women aged between 50  
51 and 70 years of age who are invited to attend routine breast screening clinics. This is  
52  
53  
54

1 consistent with the concept that “every healthcare contact is a health improvement  
2 opportunity” as embodied within NHS Scotland’s health promoting health service<sup>48</sup>.  
3

4 Current epidemiological evidence highlights adult weight gain, excess body fat, low levels of  
5 physical activity and alcohol intake as modifiable factors associated with an increased risk of  
6 developing postmenopausal breast cancer<sup>3</sup>. The NHS Breast Screening setting is one of only  
7 a few nationwide opportunities that offers face to face contact by a health professional to  
8 over 70% of (healthy) women aged 50 to 70 years including significant numbers of women  
9 from deprived areas (>60% of women from SIMD quintile 1 and > than 70% from quintile  
10 2<sup>49</sup>) who may have no other opportunity to access free, personalised lifestyle change  
11 support. Few other free, national NHS clinical service provides a routine invitation to reach  
12 this number of women in this age group. At present, no support for lifestyle change is  
13 provided in this setting although survey and intervention work highlights the potential for  
14 engagement and behaviour change<sup>19,28</sup>. Recent work undertaken in Scotland in routine  
15 breast screening clinics has reported that a simple women’s magazine intervention about  
16 breast cancer risk produced by The Scottish Cancer Prevention Network resulted in 60% of  
17 respondents claiming an increased knowledge about breast cancer, lifestyle and motivation  
18 to find out more about cancer prevention with 40% of respondents expressing intentions to  
19 make lifestyle changes<sup>50</sup>. It was notable that there was no difference in results by social  
20 position. Whilst concerns have been raised about the potential for increasing health  
21 inequalities through individual level interventions, a recent Cochrane review has reported  
22 that individual obesity management interventions (in both children and adults) do not  
23 increase health inequalities<sup>51</sup>.  
24  
25  
26  
27  
28  
29  
30  
31  
32  
33  
34

35 Whilst the current trial has primary outcomes of increased physical activity and weight loss,  
36 the programme will target energy expenditure (caloric usage in physical activity) and dietary  
37 intake (caloric intake from foods, soft and alcoholic drinks). The length of the study is  
38 designed to embrace the principles of weight loss and weight loss maintenance and  
39 therefore has the potential to achieve a long term change in lifestyle habits. The study has  
40 been developed from a well conducted feasibility trial with positive indicative outcomes and  
41 utilises a gold standard multi-centre, randomised control design methodology. The  
42 development of the intervention is a unique combination of staff from academia, NHS,  
43 breast cancer charity and healthy screening attendees and employs a novel approach to  
44 deliver weight management by volunteers in community locations. The study is not powered  
45 to assess long term risk of breast cancer and indeed the intervention would need to  
46 demonstrate effective weight loss prior to investment in a cancer outcomes trial. There have  
47 been no trials of primary prevention of breast cancer using a weight management  
48  
49  
50  
51  
52  
53  
54  
55

1 intervention (largely due to length of follow up and study size). However, there are a  
2 number of ongoing trials of weight management interventions in women with a breast  
3 cancer diagnosis which will report on cancer and all-cause mortality end points (as described  
4 by Demark-Wahnefried et al<sup>52</sup>).

5  
6  
7 It should be noted that the trial is also designed to collect information relevant for clinicians  
8 and policy makers responsible for considerations about the potential roll out of the  
9 programme throughout the national NHS breast screening programme drawing on feedback  
10 from screening staff and participants. This trial is highlighted within the National Cancer  
11 Strategy as an investment from Scottish government in cancer prevention<sup>53</sup>. The  
12 programme may also have salience internationally where population based breast cancer  
13 screening programmes are offered.  
14  
15  
16  
17  
18  
19  
20  
21  
22  
23  
24  
25  
26  
27  
28  
29  
30  
31  
32  
33  
34  
35  
36  
37  
38  
39  
40  
41  
42  
43  
44  
45  
46  
47  
48  
49  
50  
51  
52  
53  
54  
55  
56  
57  
58  
59  
60

1  
2  
3  
4  
5  
6  
7  
8  
9  
10  
11  
12  
13  
14  
15  
16  
17  
18  
19  
20  
21  
22  
23  
24  
25  
26  
27  
28  
29  
30  
31  
32  
33  
34  
35  
36  
37  
38  
39  
40  
41  
42  
43  
44  
45  
46  
47  
48  
49  
50  
51  
52  
53  
54  
55  
56  
57  
58  
59  
60

**Figure Legend**

Figure 1 Study Flow Chart

For peer review only



## REFERENCES

1. <https://www.isdscotland.org/Health-Topics/Cancer/Publications/2016-05-17/2016-05-17-Cancer-Incidence-Summary.pdf> Accessed 15.01.18.
2. <http://www.isdscotland.org/Health-Topics/Cancer/Publications/2015-08-18/2015-08-18-Cancer-Incidence-Projections-Report.pdf> Accessed 15.01.18.
3. <https://www.wcrf-uk.org/uk/preventing-cancer/cancer-preventability-statistics/breast-cancer> Accessed 15.01.18.
4. World Cancer Research Fund International / American Institute for Cancer Research. Continuous Update Project Report: Diet, Nutrition, Physical Activity and Breast Cancer, 2017. Available at: [wcrf.org/breast-cancer-2017](http://wcrf.org/breast-cancer-2017) Accessed 15.01.18.
5. Eliassen AH, Colditz GA, Rosner B, Willett WC, Hankinson SE. Adult weight change and risk of postmenopausal breast cancer JAMA 2006 Jul 12;296(2):193-201.
6. Ahn J, Schatzkin A, Lacey Jr JV, et al. Adiposity, adult weight change, and postmenopausal breast cancer risk. Archives of Internal Medicine. 2007 167(19):2091.
7. Emaus MJ, van Gils CH, Bakker MF, et al. Weight change in middle adulthood and breast cancer risk in the EPIC-PANACEA study. Int. J. Cancer 2014 135; 2887–2899.
8. Neuhauser ML, Aragaki AK, Prentice RL et al. Overweight, Obesity, and Postmenopausal Invasive Breast Cancer Risk: A Secondary Analysis of the Women’s Health Initiative Randomized Clinical Trials. 2015 JAMA oncology 1 (5) 611-621.
9. Hastert TA, Beresford SAA, Patterson RE, Alan R. Kristal AR, White E. Adherence to WCRF/AICR cancer prevention recommendations and risk of postmenopausal breast cancer. Cancer Epidemiol Biomarkers Prev 2013 22:1498-1508.
10. Kohler LN, Garcia DO, Harris RB, Oren E, Roe DJ, Jacobs ET. Adherence to Diet and Physical Activity Cancer Prevention Guidelines and Cancer outcomes: A systematic review. Cancer Epidemiol Biomarkers Prev. 2016 Jul; 25(7):1018-28.
11. Byers T, Sedjo RL: Does intentional weight loss reduce cancer risk? Diabetes Obes Metab 2011 13(12):1063-72.
12. Schauer DP, Feigelson HS, Koebnick C, et al. Bariatric Surgery and the Risk of Cancer in a Large Multisite Cohort. Ann Surg. 2017 Sep 21.

- 1 13. Lauby-Secretan B, Scoccianti C, Loomis D, et al. Body Fatness and Cancer--Viewpoint of  
2 the IARC Working Group. *N Engl J Med*. 2016 Aug 25;375(8):794-8.
- 3
- 4 14. Lean ME, Leslie WS, Barnes AC, et al. Primary care-led weight management for remission  
5 of type 2 diabetes (DiRECT): an open-label, cluster-randomised trial. *Lancet*. 2017 Dec 4.
- 6
- 7 15. Owens C, Conaghan PG. Improving joint pain and function in osteoarthritis. *Practitioner*.  
8 2016 Dec; 260(1799):17-20.
- 9
- 10
- 11 16. [http://www.isdscotland.org/Health-Topics/Cancer/Publications/2017-04-25/2017-04-25-](http://www.isdscotland.org/Health-Topics/Cancer/Publications/2017-04-25/2017-04-25-SBSP-Cancer-Report.pdf)  
12 [SBSP-Cancer-Report.pdf](http://www.isdscotland.org/Health-Topics/Cancer/Publications/2017-04-25/2017-04-25-SBSP-Cancer-Report.pdf).
- 13
- 14
- 15 17. Fisher B, Dowding D, Pickett KE, Fylan F. Health promotion at NHS breast cancer  
16 screening clinics. *Health Promotion Int*. 2007, 22(2):137-45.
- 17
- 18 18. Fisher BA, Wilkinson L, Valencia A. [Women's interest in a personal breast cancer risk](#)  
19 [assessment and lifestyle advice at NHS mammography screening](#). *J Public Health (Oxf)*.  
20 2017 Mar 1;39(1):113-121.
- 21
- 22
- 23 19. Anderson AS, Mackison D, Boath C, Steele RJC. Promoting changes in diet and physical  
24 activity in breast and colorectal cancer screening settings- an unexplored opportunity for  
25 endorsing healthy behaviours. *Cancer Prev Res (Phila)*. 2013 Mar;6(3):165-72.
- 26
- 27
- 28 20. Eccles SA, Aboagye EO, Ali S, et al. Critical research gaps and translational priorities for  
29 the successful prevention and treatment of breast cancer. *Breast Cancer Res*. 2013 Oct  
30 1;15(5):R92.
- 31
- 32
- 33 21. Howell A, Anderson AS, Clarke RB, et al. Risk determination and prevention of breast  
34 cancer. *Breast Cancer Res*. 2014 Sep 28;16(5):446.
- 35
- 36
- 37 22. [Scottish Government \(2017\). Scottish Health Survey: Main Report \[online\]. Available at:](#)  
38 <http://www.gov.scot/Publications/2017/10/2970/downloads>. Accessed 15 Jan 2018.
- 39
- 40
- 41 23. NICE Weight management: lifestyle services for overweight or obese adults. Public health  
42 guideline [PH53] <https://www.nice.org.uk/guidance/ph53>.
- 43
- 44 24. William H Dietz, Louise A Baur, Kevin Hall, Rebecca M Puhl, Elsie M Taveras, Ricardo  
45 Uauy, Peter Kopelman. *Lancet obesity series 5. Management of obesity: improvement of*  
46 *health-care training and systems for prevention and care*. vol 385, June 20, 2015.
- 47
- 48
- 49 25. <http://www.nsd.scot.nhs.uk/services/screening/breastscreening/index.html>
- 50
- 51 26. <http://www.isdscotland.org/Health-Topics/Cancer/Breast-Screening/>
- 52
- 53
- 54
- 55
- 56
- 57
- 58
- 59
- 60

- 1 27. Anderson AS, Macleod M, Mutrie N et al. Breast cancer risk reduction - is it feasible to  
2 initiate a randomised controlled trial of a lifestyle intervention programme (ActWELL)  
3 within a national breast screening programme? *Int J Behav Nutr Phys Act.* 2014 Dec  
4 17;11:156.
- 7 28. Conway E, Wyke S, Sugden J, Mutrie N, Anderson AS, ActWELL team. Can a lifestyle  
8 intervention be offered through NHS breast cancer screening? Challenges and  
9 opportunities identified in a qualitative study of women attending screening. *BMC Public*  
10 *Health.* 2016 Aug 11;16(1):758.
- 13 29. Scottish Government, Scottish Index of Multiple Deprivation  
14 <http://www.scotland.gov.uk/Topics/Statistics/SIMD/> Last accessed 19/01/2018.
- 17 30. Breast Cancer Now (2017) Breast cancer risk the Facts.  
18 [http://breastcancernow.org/sites/default/files/public/risk\\_booklet\\_pdf\\_final\\_sept\\_2015\\_1.](http://breastcancernow.org/sites/default/files/public/risk_booklet_pdf_final_sept_2015_1.pdf)  
19 [pdf](http://breastcancernow.org/sites/default/files/public/risk_booklet_pdf_final_sept_2015_1.pdf). Last accessed 30/3/17.
- 22 31. Anderson AS, Dunlop J, Gallant S, et al. Feasibility study to assess the impact of a  
23 lifestyle intervention ('LivingWELL') in people having an assessment of their family history  
24 of colorectal or breast cancer. *BMJ Open.* 2018 Feb 1;8(2).
- 27 32. Michie S, Abraham C, Whittington C, McAteer J, Gupta S: Effective Techniques in Healthy  
28 Eating and Physical Activity Interventions: A Meta-Regression. *Health Psychol.* 2009  
29 Nov;28(6):690-701.
- 32 33. Michie, S, van Stralen MM, West, R. The behaviour change wheel: a new method for  
33 characterising and designing behaviour change interventions. *Implementation Science*  
34 2011 6:42.
- 37 34. Michie S, Ashford S, Sniehotta FF, Dombrowski SU, Bishop A, French DP. A refined  
38 taxonomy of behaviour change techniques to help people change their physical activity and  
39 healthy eating behaviours: The CALO-RE taxonomy. *Psychol Health.* 2011  
40 Nov;26(11):1479-98.
- 43 35. Diabetes Prevention Programme Research Group Reduction in the Incidence of Type 2  
44 Diabetes with Lifestyle Intervention or Metformin *NEJM* 2002 346 393-403.
- 47 36. Beeken RJ, Leurent B, Vickerstaff V, et al. A brief intervention for weight control based on  
48 habit-formation theory delivered through primary care: results from a randomised  
49 controlled trial. *Int J Obes (Lond)* 2017 Feb; 41(2):246-254.

- 1 37. Physical Activity and Health Alliance. Scottish physical activity screening question (Scot-  
2 PASQ). 2013. Available at: [http://www.paha.org.uk/Resource/scottish-physical-activity-  
4 screening-question-scot-pasq](http://www.paha.org.uk/Resource/scottish-physical-activity-<br/>3 screening-question-scot-pasq). Accessed 30/03/18.
- 5  
6 38. Scottish Intercollegiate Guidelines Network (SIGN) Management of Obesity – a national  
7 clinical guidelines 115 2010 Royal College of Physicians Edinburgh.
- 8  
9 39. Cappuccio FP, Rink E, Perkins-Porras L, McKay C, Hilton S, Steptoe A. Estimation of fruit  
10 and vegetable intake using a two-item dietary questionnaire: a potential tool for primary  
11 health care workers. *Nutr Metab Cardiovasc Dis*. 2003 Feb;13(1):12-9.
- 12  
13  
14 40. Bush K, Kivlahan DR, McDonnell MB, Fihn SD, Bradley KA. The AUDIT alcohol consumption  
15 questions (AUDIT-C): an effective brief screening test for problem drinking. Ambulatory  
16 Care Quality Improvement Project (ACQUIP). Alcohol Use Disorders Identification Test.  
17 *Arch Intern Med*. 1998 Sep 14;158(16):1789-95.
- 18  
19  
20  
21 41. Broadbent E1, Petrie KJ, Main J, Weinman J. The Brief Illness perception questionnaire. *J*  
22 *Psychosom Res*. 2006 Jun;60(6):631-7.
- 23  
24  
25 42. The EuroQol Group. EuroQol-a new facility for the measurement of health-related quality  
26 of life. *Health Policy*. 1990 Dec;16(3):199-208.
- 27  
28 43. Thomas S1, Reading J, Shephard RJ. Revision of the Physical Activity Readiness  
29 Questionnaire (PAR-Q). *Can J Sport Sci*. 1992 Dec;17(4):338-45.
- 30  
31  
32 44. Goodman JM, Thomas SG, Burr J. Evidence-based risk assessment and recommendations  
33 for exercise testing and physical activity clearance in apparently healthy individuals. *Appl*  
34 *Physiol Nutr Metab*. 2011 Jul;36 Suppl 1: S14-32.
- 35  
36  
37 45. Lowther M, Mutrie N, Loughlan C, McFarlane C. Development of a Scottish physical  
38 activity questionnaire: a tool for use in physical activity interventions. *Br J Sports Med*.  
39 1999 Aug;33(4):244-9.
- 40  
41  
42 46. Baker G, Gray SR, Wright A, Fitzsimons C, Nimmo M, Lowry R, Mutrie N; Scottish  
43 Physical Activity Research Collaboration (SPARColl). The effect of a pedometer-based  
44 community walking intervention "Walking for Well Being in the West" on physical activity  
45 levels and health outcomes: a 12 week randomised controlled trial. 2010 *Int J Behav Nutr*  
46 *Phys Act* 7:51.
- 47  
48  
49 47. [Mutrie N](#), [Doolin O](#), [Fitzsimons CE](#), [Grant PM](#), [Granat M](#), [Grealy M](#), [Macdonald H](#),  
50 [MacMillan F](#), [McConnachie A](#), [Rowe DA](#), [Shaw R](#), [Skelton DA](#). "Increasing older adults'  
51 walking through primary care: results of a pilot randomized controlled trial." 2012 *Family*  
52 *Practice* 29 (6): 633-642.
- 53  
54  
55

- 1 48. Health Promoting Health Service Service- NHS Health Scotland. Overview (2009).  
2 [www.healthscotland.com/documents/4128.aspx](http://www.healthscotland.com/documents/4128.aspx).  
3
- 4 49. <http://www.isdscotland.org/Health-Topics/Cancer/Breast-Screening/>.  
5
- 6 50. Macleod M, Anderson AS [Cancer prevention-the feasibility and acceptability of promoting](#)  
7 [breast cancer risk reduction in the screening setting through a lifestyle magazine](#). Eur J  
8 Cancer Care 2018 27(2):e12823.  
9
- 10  
11 51. [Bambra CL](#) , [Hillier FC](#) , [Cairns JM](#) , [Kasim A](#) , [Moore HJ](#) , [Summerbell CD](#) How effective  
12 are interventions at reducing socioeconomic inequalities in obesity among children and  
13 adults? Two systematic reviews. 2015 NIHR Journal Library  
14 <https://www.ncbi.nlm.nih.gov/pubmedhealth/PMH0091702/>.  
15  
16
- 17 52. Demark-Wahnefried W, Schmitz KH, Alfano CM, Bail JR, Goodwin PJ, Thomson CA,  
18 Bradley DW, Courneya KS, Befort CA, Denlinger CS, Ligibel JA, Dietz WH, Stolley MR, Irwin  
19 ML, Bamman MM, Apovian CM, Pinto BM, Wolin KY, Ballard RM, Dannenberg AJ, Eakin EG,  
20 Longjohn MM, Raffa SD, Adams-Campbell LL, Buzaglo JS, Nass SJ, Massetti GM, Balogh EP,  
21 Kraft ES, Parekh AK, Sanghavi DM, Morris GS, Basen-Engquist K. Weight management and  
22 physical activity throughout the cancer care continuum CA Cancer J Clin 2018 68(1) 64-89.  
23  
24  
25  
26
- 27 53. Scottish Government (2016) Beating Cancer: Ambition and Action Scottish Government  
28 <http://www.gov.scot/Publications/2016/03/9784>.  
29  
30  
31  
32  
33  
34  
35  
36  
37  
38  
39  
40  
41  
42  
43  
44  
45  
46  
47  
48  
49  
50  
51  
52  
53  
54  
55  
56  
57  
58  
59  
60

Figure 1 Study Flow Chart

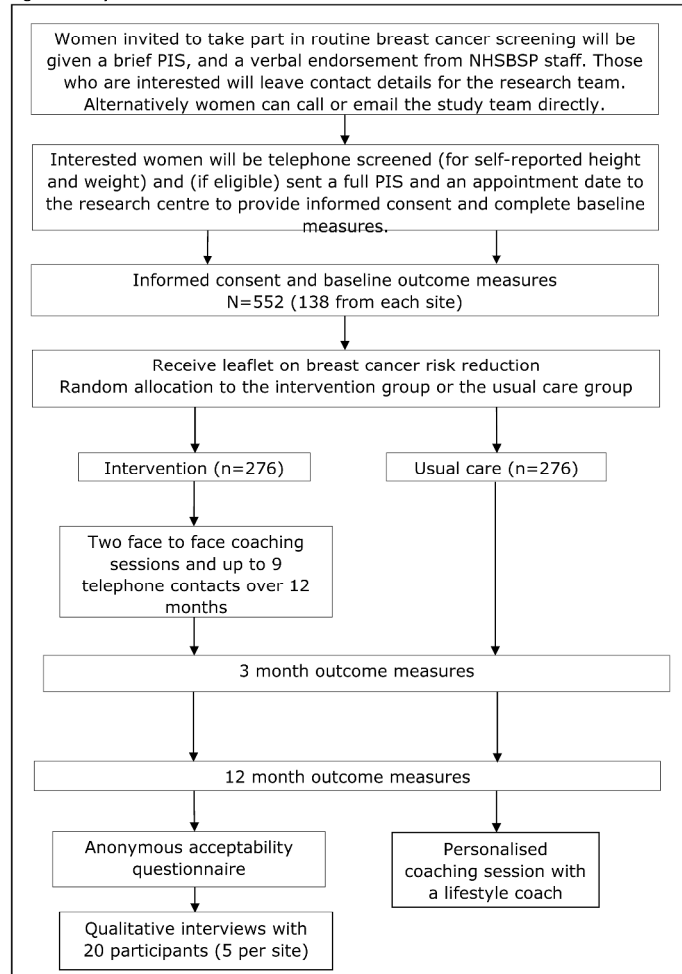

## Appendix 1

### PRECIS – 2 for ActWELL

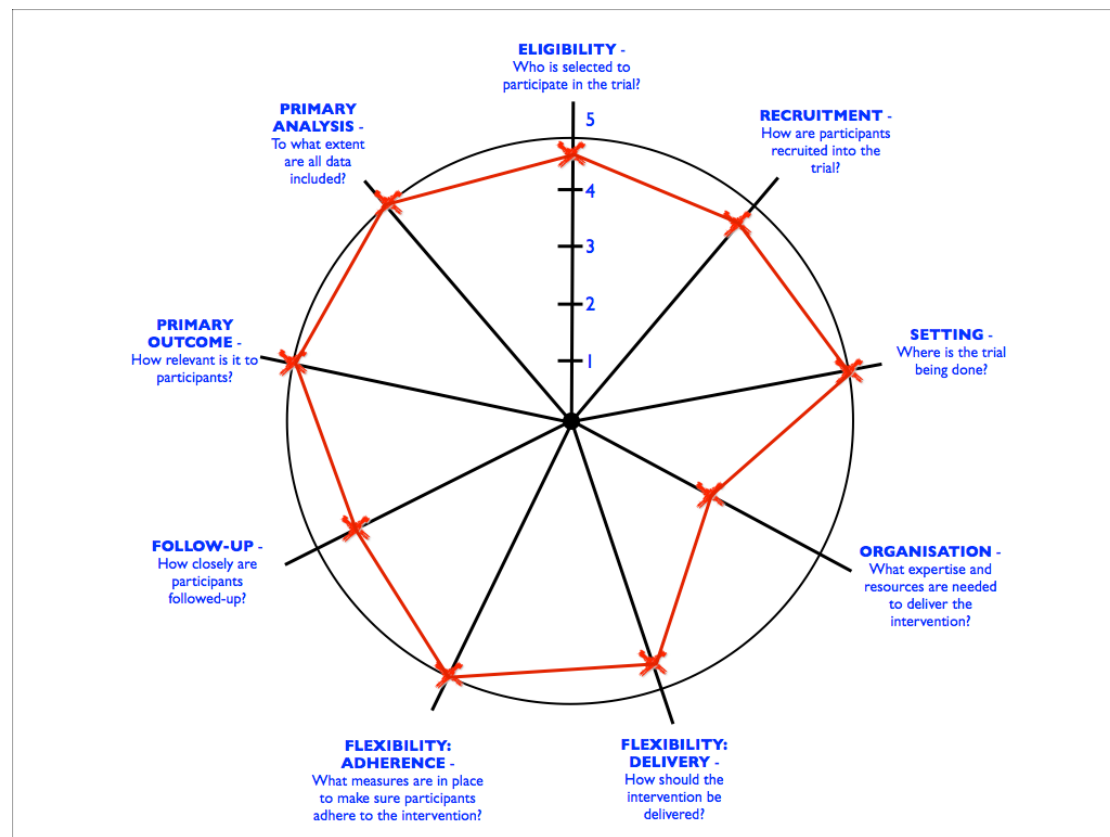

#### PRECIS-2 wheel for the ActWELL trial.

The trial aims to be highly pragmatic in design approach, which is reflected in the wheel with the exception of the *Organisation* domain. The ActWELL intervention involves a new way of delivering lifestyle counselling (Breast Cancer Now volunteers) so the trial is more explanatory on this domain. Evaluating this mode of delivery is, however, the aim of the trial and should the intervention prove effective, the trial would provide support for involving the voluntary sector in routine delivery of the ActWELL intervention.

More information on PRECIS-2 is available at <https://www.precis-2.org> and in Loudon K, Treweek S, Sullivan F, Donnan P, Thorpe KE, Zwarenstein M. The PRECIS-2 tool: designing trials that are fit for purpose. *BMJ* 2015; 350: h2147–7.

## Appendix 2

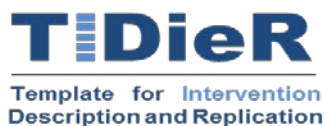

### The TIDieR (Template for Intervention Description and Replication) Checklist\*:

#### 1. Brief Name

ActWELL

#### 2. WHY

Following the COM-B model the intervention aims to incorporate increased **Motivation** for weight management (through awareness raising within the teachable moment setting) combined with increased **Capability** for effective lifestyle change combined with **Opportunities** for greater physical activity through an emphasis on walking initiatives and other community facilities using taxonomy-derived effective behaviour change techniques.

#### 3. WHAT

##### a) Materials

##### Visit 1

- Touch, Look Check leaflet ([http://breastcancer.org/sites/default/files/public/tlc\\_breast\\_awareness\\_guide.pdf](http://breastcancer.org/sites/default/files/public/tlc_breast_awareness_guide.pdf))
- Breast cancer and lifestyle FAQ and links to science base (WCRF) (in house developed)
- BMI chart to identify BMI number and weight status (NHS)
- Assessing baseline step count (in house developed)
- Physical activity recommendations from UK Department of Health
- Kettlecise ways to reduce sedentary behaviour (<http://www.cancerpreventionscotland.org.uk/resources/kettlecise/>)
- Warm up exercises (in house developed)
- Walking Plan and Diary (in house developed)
- Implementation intention sheets (in house developed)
- Information sheet on calories and alcohol infographic (<https://www.behance.net/gallery/5830267/Calories-Alcohol-infographic>)
- Sugar savvy quiz <https://www.wcrf-uk.org/sites/default/files/are-you-sugar-savvy-game.pdf>
- Weight awareness plan (weekly weight logbook) (in house developed)
- Five day food and drink diary (in house developed)

##### Visit 2

- Eatwell Guide (NHS Tayside)
- Personalised weight loss plan (British heart Foundation)



- Implementation Intentions sheet (in house developed)
- Portion distortion quiz
- Food Labelling Guidance – credit card size (NHS Tayside)
- British Heart Foundation Booklet 'Your simple guide to weight loss'  
<https://www.bhf.org.uk/publications/healthy-eating-and-drinking/facts-not-fads---your-simple-guide-to-healthy-weight-loss>

## b) Procedures

Overall: Two face to face visits plus nine monthly phone calls

### Visit 1 (60 minutes)

- Check well-being
  - Self-identification of BMI
  - Instruct participant on pedometer use and proposed walking programme
  - Walk and talk 10 min  
(interactive walking session and discussion about increasing physical activity)
  - Physical activity goal setting  
(implementation intention setting and personalised walking programme)
  - Discuss how to reduce sedentary behaviour
  - Caloric value of (hot and cold) alcohol and sugary drinks discussed  
 "Sugar Savvy" quiz undertaken (<https://www.wcrf-uk.org/sites/default/files/are-you-sugar-savvy-game.pdf>)  
 (advice given on alternatives, portion size, frequency)  
 (Possibility of implementation intention setting on drinks)
  - Weight loss goal  
(emphasis on modest up to 7% in 12 months)
  - Motivational interviewing questions on weight loss
  - Guidance on weekly self-weighing, reporting and feedback–  
(implementation intention setting for weighing– scales available for home use)
  - Initial dietary challenges – snacking and "weakness foods"  
(based on a verbal 24 hour intake)
  - Summarise meeting – goals set, times of relapse
- All participants invited to undertake a 24 hour written diet recall for 5 days for review at visit 2

### Visit 2 (45 minutes)

- Check well being
- Praise success (however modest)
- Evaluate and appraise PA goals  
(Discuss how they feel physically and mentally about success of walking, or problems and possible solutions, review goals)
- Check body weight recorded

- Reminder about body weight and breast cancer risk reduction (even after 50)
- Highlight weight loss principles  
(revising snacking, importance of meal patterns and 5 a day)
- Remind about goal set for weight loss and how this converts to personal eating plan
- Review 24 hour diet recall sheets (handed out last visit)  
(or take a 24 hour recall if sheets not completed)
- Discuss calories – focus on -600kcal deficit diet  
(Identify personalised eating plan using British Heart Foundation (BHF) materials)
- Discuss Portion sizes and frequencies  
(use images from BHF materials and portion distortion information)
- Food labelling  
(Identify energy values for low and high, advise avoiding red TL, advise using at home)
- Identify Implementation intentions on one food/drinking habit  
(set one only- if suggestions needed base on 24 hour recordings)
- Summarise goals and key challenges, check all materials provided
- Arrange first two telephone appointments
- Discuss leisure centre activity to meet staff (if interested)

### Phone Calls

#### For all calls:

- Check well being
- Check goal progress, self-reported weight, re-enforce the importance of self-monitoring
- Identify success and challenges
- Discuss possible problems ahead (e.g. holidays)
- Coping strategies and starting again if intentions failed
- Start discussion on the importance of habits in eating behaviours using Ten Top Tips.

#### Weight Loss and Weight Loss Maintenance (using Ten Top Tips)

- Stress the importance of physical activity and social support Refer to *Tips Walk off the weight (TC1)*
- Highlight the role of lower calorie and lower fat foods Refer to *Go Reduced Fat and Look at the Labels (TC2)*
- Highlight the importance of regular food intake (including breakfast) and portion size Refer to *Keep to your meal routine and Focus on Food (TC3)*
- Stress the importance of physical activity and social support Refer to *Tips Walk off the weight (TC4)*
- Re-enforce information on snacking Refer to *Pack a Healthy snack and Five a Day (TC5)*
- Re-enforce information on drinks sweet and alcohol and value of water Refer to *Think about your drinks (TC6)*
- Re-evaluate portions size (as per BHF booklet) Refer to *Caution with your portions(TC7)*

- (TC 8) return to discussing physical activity and reducing sedentary behaviour Refer to *Up on your feet*
- Re-evaluation of goals, where next , summarise success (TC9)

#### 4. WHO PROVIDED

The intervention will be delivered by Breast Cancer Now Volunteer coaches. These will have a background and experience of counselling and receive a bespoke training programme by the research team including

- Evidence base for reducing risks of breast cancer by lifestyle
- Key principles and application of healthy food and drinks choices, appropriate portions and coping with social consumption challenges
- Key principles and application of increased physical activity and reduced sedentary behaviour
- Key principles and application of weight management
- Personalisation of advice
- Motivational interviewing techniques (key questions only)
- Use of evidence-based behavioural change techniques (BCTs)
- Handling confidential data
- The intervention protocol and importance of its delivery. Confidentiality.
- Role play and assessments (face to face and telephone contact)
- 

The programme is likely to be delivered over 4 bespoke sessions training programme. An exit certificate will be provided for those who successfully achieve the assessments and role play.

Role play and observations will be undertaken prior to commencing the actual intervention.

#### 5. HOW

Two individual 1:1 coach to participant face to face visits are planned (approx. 6 weeks apart) with monthly telephone contacts thereafter.

#### 6. WHERE

The face to face visits are scheduled to take part in office space in local leisure centres. Each town has identified more than one possible venue and these will be noted. No home visits are scheduled and other locations are discouraged.

#### 7. WHEN and HOW MUCH

The coaches will collect data for each participant on; date of contact, duration of contact and perceived engagement for both face to face and 9 telephone contacts. Other contacts

1  
2  
3 e.g. SMS/email will also be noted. These data will allow dose and duration and outcomes to  
4 be assessed by individual coaches as well as overall.  
5

## 6 **8. TAILORING**

7 Personalised advice is a key component of all aspects of the intervention. Motivational  
8 interviewing about weight loss will be undertaken to identify participant ambivalence and  
9 perceived personal advantages to weight management.  
10

11 **Caloric prescription:** this will be based on -600kcal required for weight maintenance  
12 (calculated using the equations from Mifflin St Jeor according to gender, age and body  
13 weight). Participant agreed goals (and implementation intentions) will be used for weighing  
14 and recording body weight (self-monitoring) and personalised feedback will be provided.  
15

16 **Food and drink choices** will be based on information obtained from current eating habits  
17 obtained through 24 hour recalls to guide personalised advice on food frequency, portion  
18 sizes and foods to limit. Participant agreed goals (and implementation intentions) will be  
19 used for one specific food or drinking habit and this will be self monitored with personalised  
20 feedback provided.  
21

22 **Physical activity dose** and duration will be based on the brief Scottish Physical Activity  
23 questionnaire to guide walking plans and signpost other activities (including those offered in  
24 the local leisure centres). Participant agreed goals (and implementation intentions) will be  
25 used for one specific aspect of habitual walking and this will be self- monitored with  
26 personalised feedback provided  
27

## 28 **9. MODIFICATIONS**

29 **Recommendations for modifications may arise from**

- 30 a) Feedback from coaches (individual issues or during regular round table meetings)  
31 b) Changes in evidence base for guidance  
32 c) Adverse events  
33

## 34 **10. HOW WELL**

35 **Fidelity Procedures:** We will undertake qualitative process measures to assess fidelity to  
36 the intervention. Time for implementation procedures will be recorded by intervention staff.  
37 Fidelity of programme delivery and content will be assessed by audio-recording and  
38 transcription of a random sample of LC face to face interactions and telephone contacts at  
39 each site. These will be compared to the protocol specified number of points to be covered  
40 in each session by a researcher at University of Stirling independent from the intervention.  
41  
42  
43  
44  
45  
46  
47  
48  
49  
50  
51  
52  
53  
54  
55  
56  
57  
58  
59  
60

1  
2  
3  
4  
5  
6  
7  
8  
9  
10  
11  
12  
13  
14  
15  
16  
17  
18  
19  
20  
21  
22  
23  
24  
25  
26  
27  
28  
29  
30  
31  
32  
33  
34  
35  
36  
37  
38  
39  
40  
41  
42  
43  
44  
45  
46  
47  
48  
49  
50  
51  
52  
53  
54  
55  
56  
57  
58  
59  
60

For peer review only

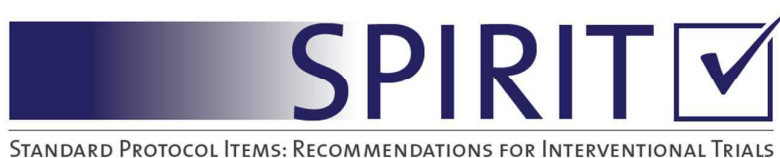

SPIRIT 2013 Checklist: Recommended items to address in a clinical trial protocol and related documents\*

| Section/item                      | Item No | Description                                                                                                                                                                                                                                                                              | Page |
|-----------------------------------|---------|------------------------------------------------------------------------------------------------------------------------------------------------------------------------------------------------------------------------------------------------------------------------------------------|------|
| <b>Administrative information</b> |         |                                                                                                                                                                                                                                                                                          |      |
| Title                             | 1       | Descriptive title identifying the study design, population, interventions, and, if applicable, trial acronym                                                                                                                                                                             | 1    |
| Trial registration                | 2a      | Trial identifier and registry name. If not yet registered, name of intended registry                                                                                                                                                                                                     | 3    |
|                                   | 2b      | All items from the World Health Organization Trial Registration Data Set                                                                                                                                                                                                                 |      |
| Protocol version                  | 3       | Date and version identifier                                                                                                                                                                                                                                                              | NR   |
| Funding                           | 4       | Sources and types of financial, material, and other support                                                                                                                                                                                                                              | 4    |
| Roles and responsibilities        | 5a      | Names, affiliations, and roles of protocol contributors                                                                                                                                                                                                                                  | 1, 5 |
|                                   | 5b      | Name and contact information for the trial sponsor                                                                                                                                                                                                                                       | N/A  |
|                                   | 5c      | Role of study sponsor and funders, if any, in study design; collection, management, analysis, and interpretation of data; writing of the report; and the decision to submit the report for publication, including whether they will have ultimate authority over any of these activities | N/A  |
|                                   | 5d      | Composition, roles, and responsibilities of the coordinating centre, steering committee, endpoint adjudication committee, data management team, and other individuals or groups overseeing the trial, if applicable (see Item 21a for data monitoring committee)                         | N/A  |
| <b>Introduction</b>               |         |                                                                                                                                                                                                                                                                                          |      |
| Background and rationale          | 6a      | Description of research question and justification for undertaking the trial, including summary of relevant studies (published and unpublished) examining benefits and harms for each intervention                                                                                       | 6, 7 |
|                                   | 6b      | Explanation for choice of comparators                                                                                                                                                                                                                                                    | 6, 7 |
| Objectives                        | 7       | Specific objectives or hypotheses                                                                                                                                                                                                                                                        |      |

|    |  |  |  |  |
|----|--|--|--|--|
| 1  |  |  |  |  |
| 2  |  |  |  |  |
| 3  |  |  |  |  |
| 4  |  |  |  |  |
| 5  |  |  |  |  |
| 6  |  |  |  |  |
| 7  |  |  |  |  |
| 8  |  |  |  |  |
| 9  |  |  |  |  |
| 10 |  |  |  |  |
| 11 |  |  |  |  |
| 12 |  |  |  |  |
| 13 |  |  |  |  |
| 14 |  |  |  |  |
| 15 |  |  |  |  |
| 16 |  |  |  |  |
| 17 |  |  |  |  |
| 18 |  |  |  |  |
| 19 |  |  |  |  |
| 20 |  |  |  |  |
| 21 |  |  |  |  |
| 22 |  |  |  |  |
| 23 |  |  |  |  |
| 24 |  |  |  |  |
| 25 |  |  |  |  |
| 26 |  |  |  |  |
| 27 |  |  |  |  |
| 28 |  |  |  |  |
| 29 |  |  |  |  |
| 30 |  |  |  |  |
| 31 |  |  |  |  |
| 32 |  |  |  |  |
| 33 |  |  |  |  |
| 34 |  |  |  |  |
| 35 |  |  |  |  |
| 36 |  |  |  |  |
| 37 |  |  |  |  |
| 38 |  |  |  |  |
| 39 |  |  |  |  |
| 40 |  |  |  |  |
| 41 |  |  |  |  |
| 42 |  |  |  |  |
| 43 |  |  |  |  |
| 44 |  |  |  |  |
| 45 |  |  |  |  |
| 46 |  |  |  |  |
| 47 |  |  |  |  |
| 48 |  |  |  |  |
| 49 |  |  |  |  |
| 50 |  |  |  |  |
| 51 |  |  |  |  |
| 52 |  |  |  |  |
| 53 |  |  |  |  |
| 54 |  |  |  |  |
| 55 |  |  |  |  |
| 56 |  |  |  |  |
| 57 |  |  |  |  |
| 58 |  |  |  |  |
| 59 |  |  |  |  |
| 60 |  |  |  |  |

**Methods: Participants, interventions, and outcomes**

|                      |     |                                                                                                                                                                                                                                                                                                                                                                                |                      |
|----------------------|-----|--------------------------------------------------------------------------------------------------------------------------------------------------------------------------------------------------------------------------------------------------------------------------------------------------------------------------------------------------------------------------------|----------------------|
| Study setting        | 9   | Description of study settings (eg, community clinic, academic hospital) and list of countries where data will be collected. Reference to where list of study sites can be obtained                                                                                                                                                                                             | 8, 9                 |
| Eligibility criteria | 10  | Inclusion and exclusion criteria for participants. If applicable, eligibility criteria for study centres and individuals who will perform the interventions (eg, surgeons, psychotherapists)                                                                                                                                                                                   | 9, 10                |
| Interventions        | 11a | Interventions for each group with sufficient detail to allow replication, including how and when they will be administered                                                                                                                                                                                                                                                     | 11, 12               |
|                      | 11b | Criteria for discontinuing or modifying allocated interventions for a given trial participant (eg, drug dose change in response to harms, participant request, or improving/worsening disease)                                                                                                                                                                                 | N/A                  |
|                      | 11c | Strategies to improve adherence to intervention protocols, and any procedures for monitoring adherence (eg, drug tablet return, laboratory tests)                                                                                                                                                                                                                              | 16-18                |
|                      | 11d | Relevant concomitant care and interventions that are permitted or prohibited during the trial                                                                                                                                                                                                                                                                                  | N/A                  |
| Outcomes             | 12  | Primary, secondary, and other outcomes, including the specific measurement variable (eg, systolic blood pressure), analysis metric (eg, change from baseline, final value, time to event), method of aggregation (eg, median, proportion), and time point for each outcome. Explanation of the clinical relevance of chosen efficacy and harm outcomes is strongly recommended | 13-16                |
| Participant timeline | 13  | Time schedule of enrolment, interventions (including any run-ins and washouts), assessments, and visits for participants. A schematic diagram is highly recommended (see Figure)                                                                                                                                                                                               | 12<br>(See Figure 1) |
| Sample size          | 14  | Estimated number of participants needed to achieve study objectives and how it was determined, including clinical and statistical assumptions supporting any sample size calculations                                                                                                                                                                                          | 18, 19               |
| Recruitment          | 15  | Strategies for achieving adequate participant enrolment to reach target sample size                                                                                                                                                                                                                                                                                            |                      |

**Methods: Assignment of interventions (for controlled trials)**

Allocation:

|    |                                                           |     |                                                                          |        |
|----|-----------------------------------------------------------|-----|--------------------------------------------------------------------------|--------|
| 1  |                                                           |     |                                                                          |        |
| 2  | Sequence                                                  | 16a | Method of generating the allocation sequence (eg, computer-              | 10     |
| 3  | generation                                                |     | generated random numbers), and list of any factors for                   |        |
| 4  |                                                           |     | stratification. To reduce predictability of a random sequence,           |        |
| 5  |                                                           |     | details of any planned restriction (eg, blocking) should be provided     |        |
| 6  |                                                           |     | in a separate document that is unavailable to those who enrol            |        |
| 7  |                                                           |     | participants or assign interventions                                     |        |
| 8  |                                                           |     |                                                                          |        |
| 9  | Allocation                                                | 16b | Mechanism of implementing the allocation sequence (eg, central           | 10, 11 |
| 10 | concealment                                               |     | telephone; sequentially numbered, opaque, sealed envelopes),             |        |
| 11 | mechanism                                                 |     | describing any steps to conceal the sequence until interventions         |        |
| 12 |                                                           |     | are assigned                                                             |        |
| 13 |                                                           |     |                                                                          |        |
| 14 | Implementation                                            | 16c | Who will generate the allocation sequence, who will enrol                | 10, 11 |
| 15 |                                                           |     | participants, and who will assign participants to interventions          |        |
| 16 |                                                           |     |                                                                          |        |
| 17 | Blinding                                                  | 17a | Who will be blinded after assignment to interventions (eg, trial         | 11     |
| 18 | (masking)                                                 |     | participants, care providers, outcome assessors, data analysts),         |        |
| 19 |                                                           |     | and how                                                                  |        |
| 20 |                                                           |     |                                                                          |        |
| 21 |                                                           | 17b | If blinded, circumstances under which unblinding is permissible,         | N/A    |
| 22 |                                                           |     | and procedure for revealing a participant's allocated intervention       |        |
| 23 |                                                           |     | during the trial                                                         |        |
| 24 |                                                           |     |                                                                          |        |
| 25 |                                                           |     |                                                                          |        |
| 26 | <b>Methods: Data collection, management, and analysis</b> |     |                                                                          |        |
| 27 |                                                           |     |                                                                          |        |
| 28 | Data collection                                           | 18a | Plans for assessment and collection of outcome, baseline, and            | 15-18  |
| 29 | methods                                                   |     | other trial data, including any related processes to promote data        |        |
| 30 |                                                           |     | quality (eg, duplicate measurements, training of assessors) and a        |        |
| 31 |                                                           |     | description of study instruments (eg, questionnaires, laboratory         |        |
| 32 |                                                           |     | tests) along with their reliability and validity, if known. Reference to |        |
| 33 |                                                           |     | where data collection forms can be found, if not in the protocol         |        |
| 34 |                                                           |     |                                                                          |        |
| 35 |                                                           | 18b | Plans to promote participant retention and complete follow-up,           | NR     |
| 36 |                                                           |     | including list of any outcome data to be collected for participants      |        |
| 37 |                                                           |     | who discontinue or deviate from intervention protocols                   |        |
| 38 |                                                           |     |                                                                          |        |
| 39 | Data                                                      | 19  | Plans for data entry, coding, security, and storage, including any       | 15     |
| 40 | management                                                |     | related processes to promote data quality (eg, double data entry;        |        |
| 41 |                                                           |     | range checks for data values). Reference to where details of data        |        |
| 42 |                                                           |     | management procedures can be found, if not in the protocol               |        |
| 43 |                                                           |     |                                                                          |        |
| 44 |                                                           |     |                                                                          |        |
| 45 | Statistical                                               | 20a | Statistical methods for analysing primary and secondary                  | 19, 20 |
| 46 | methods                                                   |     | outcomes. Reference to where other details of the statistical            |        |
| 47 |                                                           |     | analysis plan can be found, if not in the protocol                       |        |
| 48 |                                                           |     |                                                                          |        |
| 49 |                                                           | 20b | Methods for any additional analyses (eg, subgroup and adjusted           | 19     |
| 50 |                                                           |     | analyses)                                                                |        |
| 51 |                                                           |     |                                                                          |        |
| 52 |                                                           | 20c | Definition of analysis population relating to protocol non-adherence     | 19     |
| 53 |                                                           |     | (eg, as randomised analysis), and any statistical methods to             |        |
| 54 |                                                           |     | handle missing data (eg, multiple imputation)                            |        |
| 55 |                                                           |     |                                                                          |        |
| 56 |                                                           |     |                                                                          |        |
| 57 |                                                           |     |                                                                          |        |
| 58 |                                                           |     |                                                                          |        |
| 59 |                                                           |     |                                                                          |        |
| 60 |                                                           |     |                                                                          |        |



**Methods: Monitoring**

|                 |     |                                                                                                                                                                                                                                                                                                                                       |     |
|-----------------|-----|---------------------------------------------------------------------------------------------------------------------------------------------------------------------------------------------------------------------------------------------------------------------------------------------------------------------------------------|-----|
| Data monitoring | 21a | Composition of data monitoring committee (DMC); summary of its role and reporting structure; statement of whether it is independent from the sponsor and competing interests; and reference to where further details about its charter can be found, if not in the protocol. Alternatively, an explanation of why a DMC is not needed | N/A |
|                 | 21b | Description of any interim analyses and stopping guidelines, including who will have access to these interim results and make the final decision to terminate the trial                                                                                                                                                               | N/A |
| Harms           | 22  | Plans for collecting, assessing, reporting, and managing solicited and spontaneously reported adverse events and other unintended effects of trial interventions or trial conduct                                                                                                                                                     | 22  |
| Auditing        | 23  | Frequency and procedures for auditing trial conduct, if any, and whether the process will be independent from investigators and the sponsor                                                                                                                                                                                           | N/A |

**Ethics and dissemination**

|                               |     |                                                                                                                                                                                                                                  |     |
|-------------------------------|-----|----------------------------------------------------------------------------------------------------------------------------------------------------------------------------------------------------------------------------------|-----|
| Research ethics approval      | 24  | Plans for seeking research ethics committee/institutional review board (REC/IRB) approval                                                                                                                                        | 4   |
| Protocol amendments           | 25  | Plans for communicating important protocol modifications (eg, changes to eligibility criteria, outcomes, analyses) to relevant parties (eg, investigators, REC/IRBs, trial participants, trial registries, journals, regulators) | NR  |
| Consent or assent             | 26a | Who will obtain informed consent or assent from potential trial participants or authorised surrogates, and how (see Item 32)                                                                                                     | 10  |
|                               | 26b | Additional consent provisions for collection and use of participant data and biological specimens in ancillary studies, if applicable                                                                                            | N/A |
| Confidentiality               | 27  | How personal information about potential and enrolled participants will be collected, shared, and maintained in order to protect confidentiality before, during, and after the trial                                             | NR  |
| Declaration of interests      | 28  | Financial and other competing interests for principal investigators for the overall trial and each study site                                                                                                                    | 4   |
| Access to data                | 29  | Statement of who will have access to the final trial dataset, and disclosure of contractual agreements that limit such access for investigators                                                                                  | NR  |
| Ancillary and post-trial care | 30  | Provisions, if any, for ancillary and post-trial care, and for compensation to those who suffer harm from trial participation                                                                                                    | N/A |

|                                 |                         |     |                                                                                                                                                                                                                                                                                     |     |
|---------------------------------|-------------------------|-----|-------------------------------------------------------------------------------------------------------------------------------------------------------------------------------------------------------------------------------------------------------------------------------------|-----|
| 1<br>2<br>3<br>4<br>5<br>6<br>7 | Dissemination<br>policy | 31a | Plans for investigators and sponsor to communicate trial results to participants, healthcare professionals, the public, and other relevant groups (eg, via publication, reporting in results databases, or other data sharing arrangements), including any publication restrictions | 22  |
| 8<br>9<br>10                    |                         | 31b | Authorship eligibility guidelines and any intended use of professional writers                                                                                                                                                                                                      | NR  |
| 11<br>12<br>13                  |                         | 31c | Plans, if any, for granting public access to the full protocol, participant-level dataset, and statistical code                                                                                                                                                                     | N/A |

## Appendices

|                                  |                               |    |                                                                                                                                                                                                |     |
|----------------------------------|-------------------------------|----|------------------------------------------------------------------------------------------------------------------------------------------------------------------------------------------------|-----|
| 14<br>15<br>16<br>17<br>18       | Informed consent<br>materials | 32 | Model consent form and other related documentation given to participants and authorised surrogates                                                                                             | N/A |
| 19<br>20<br>21<br>22<br>23<br>24 | Biological<br>specimens       | 33 | Plans for collection, laboratory evaluation, and storage of biological specimens for genetic or molecular analysis in the current trial and for future use in ancillary studies, if applicable | NR  |

\*It is strongly recommended that this checklist be read in conjunction with the SPIRIT 2013 Explanation & Elaboration for important clarification on the items. Amendments to the protocol should be tracked and dated. The SPIRIT checklist is copyrighted by the SPIRIT Group under the Creative Commons "[Attribution-NonCommercial-NoDerivs 3.0 Unported](https://creativecommons.org/licenses/by-nc-nd/3.0/)" license.
