# Supplementary material for: Randomised controlled trial to assess the impact of a lifestyle intervention (ActWELL) in women invited to NHS breast screening
Source: PubMed Central journal article supplement — BMJ Open. 2018 Nov 8;8(11):e024136. doi: 10.1136/bmjopen-2018-024136 (PMC6231585; doi:10.1136/bmjopen-2018-024136), 2018-11-08
Supplement: bmjopen-2018-024136.reviewer_comments.pdf [file bmjopen-2018-024136.reviewer_comments.pdf]

## PEER REVIEW HISTORY

BMJ Open publishes all reviews undertaken for accepted manuscripts. Reviewers are asked to complete a checklist review form (<http://bmjopen.bmj.com/site/about/resources/checklist.pdf>) and are provided with free text boxes to elaborate on their assessment. These free text comments are reproduced below.

## ARTICLE DETAILS

|                            |                                                                                                                                                                                                          |
|----------------------------|----------------------------------------------------------------------------------------------------------------------------------------------------------------------------------------------------------|
| <b>TITLE (PROVISIONAL)</b> | A randomised controlled trial to assess the impact of a lifestyle intervention (ActWELL) in women invited to NHS breast screening – study protocol                                                       |
| <b>AUTHORS</b>             | Anderson, Annie; Craigie, Angela; Gallant, Stephanie; McAdam, Chloe; Macaskill, E.; Mutrie, Nanette; Neilson, Aileen; O'carroll, Ronan; Rauchhaus, Petra; Sattar, Naveed; Stead, Martine; Treweek, Shaun |

This article was not externally reviewed at BMJ Open. Protocols that have been independently assessed prior to submission to BMJ Open are usually fast-tracked to publication on the grounds that further substantial changes will not be possible. This independent assessment will usually be external, independent review for both a substantial grant award from a non-commercial or government funder and ethics approval.
